# Supplementary material for: Lanthanum loaded CuO nanoparticles: synthesis and characterization of a recyclable catalyst for the synthesis of 1,4-disubstituted 1,2,3-triazoles and propargylamines
Source: Royal Society of Chemistry journal article supplement (doi:10.1039/c5ra05468k), 2015-01-01
Supplement: c5ra05468k1.pdf [file c5ra05468k1.pdf]

## *Electronic Supplementary Information (ESI)*

### **RSC ADVANCES**

# **Lanthanum loaded CuO nanoparticles: synthesis and characterization of a recyclable catalyst for the synthesis of 1, 4-disubstituted 1, 2, 3-triazoles and propargylamines**

**R. Sasikala, S. Kutti Rani,\* D. Easwaramoorthy, and K. Karthikeyan\***

*Department of Chemistry, B.S. Abdur Rahman University, Vandalur, Chennai-600048, India,*

*Email: [karthiclri@gmail.com](mailto:karthiclri@gmail.com), [skrani@bsauniv.ac.in](mailto:skrani@bsauniv.ac.in)*

### **Table of Contents**

|                                                                         | Page No.   |
|-------------------------------------------------------------------------|------------|
| <sup>1</sup> H and <sup>13</sup> C NMR spectra of compounds <b>3a-n</b> | <b>S2</b>  |
| <sup>1</sup> H and <sup>13</sup> C NMR spectra of compounds <b>7a-j</b> | <b>S16</b> |

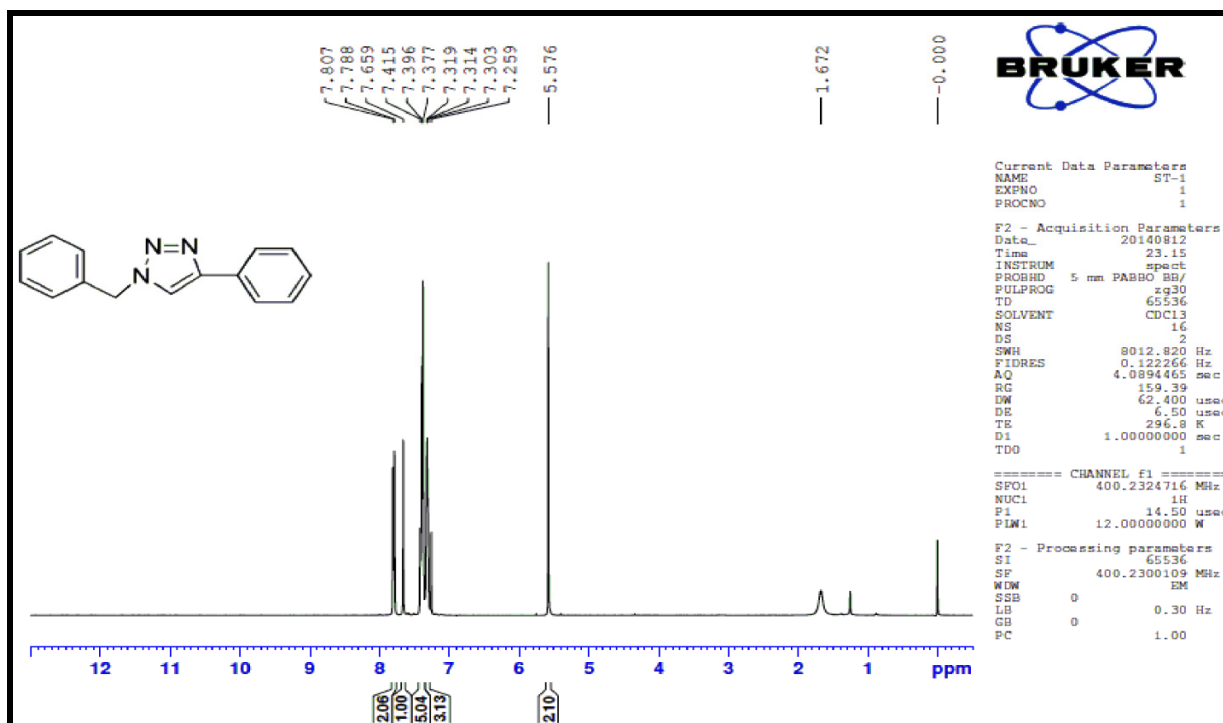

<sup>1</sup>H NMR spectrum of compound 3a

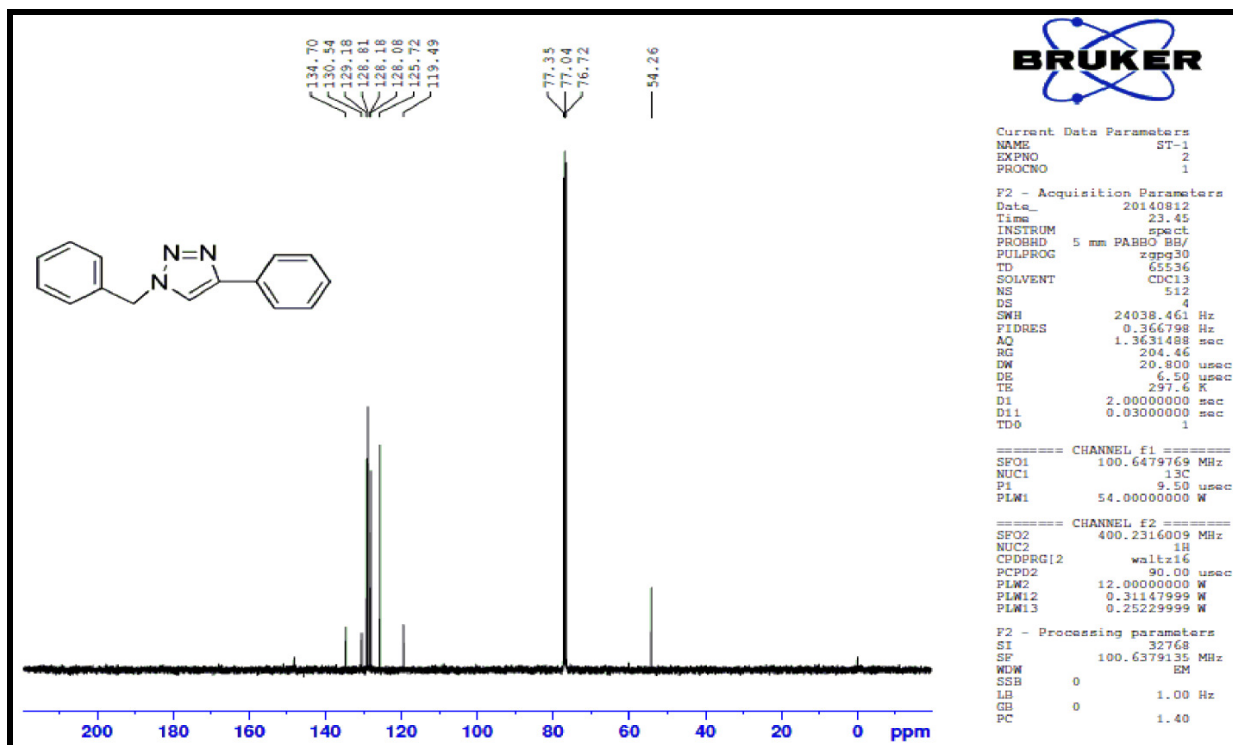

<sup>13</sup>C NMR spectrum of compound 3a

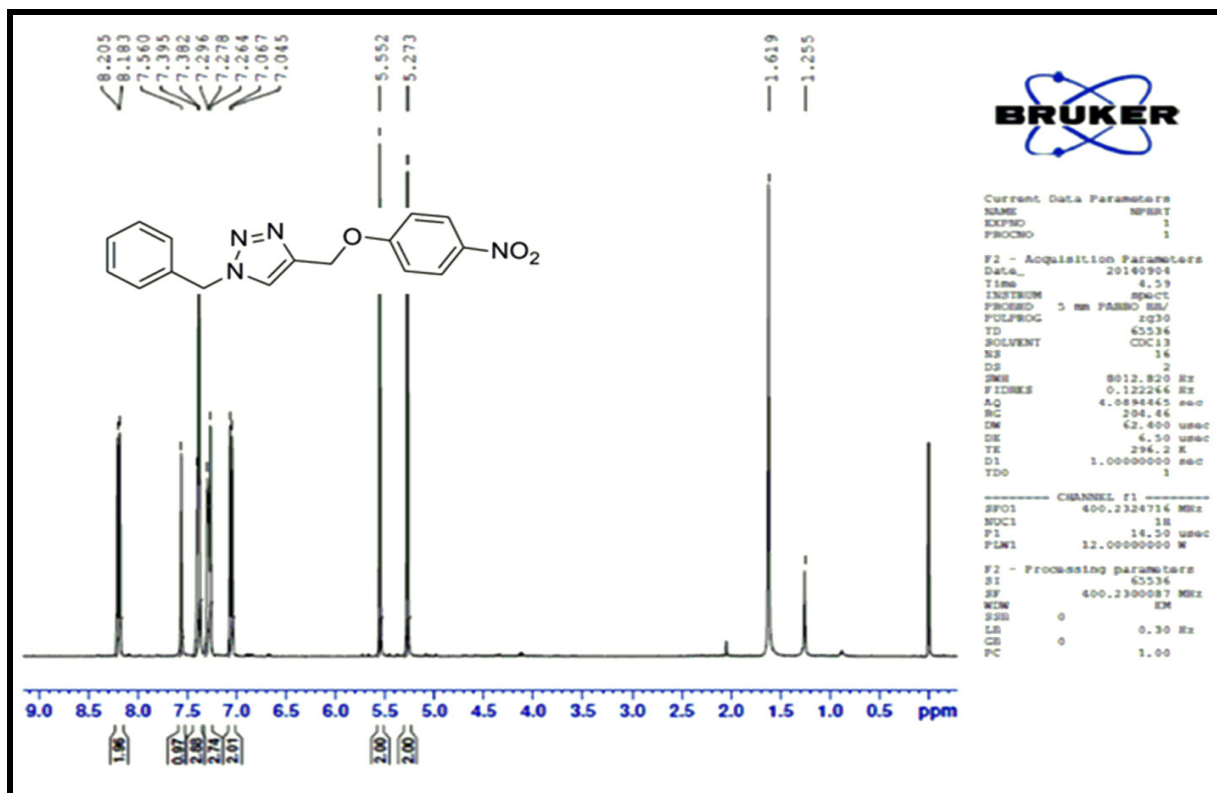

<sup>1</sup>H NMR spectrum of compound **3b**

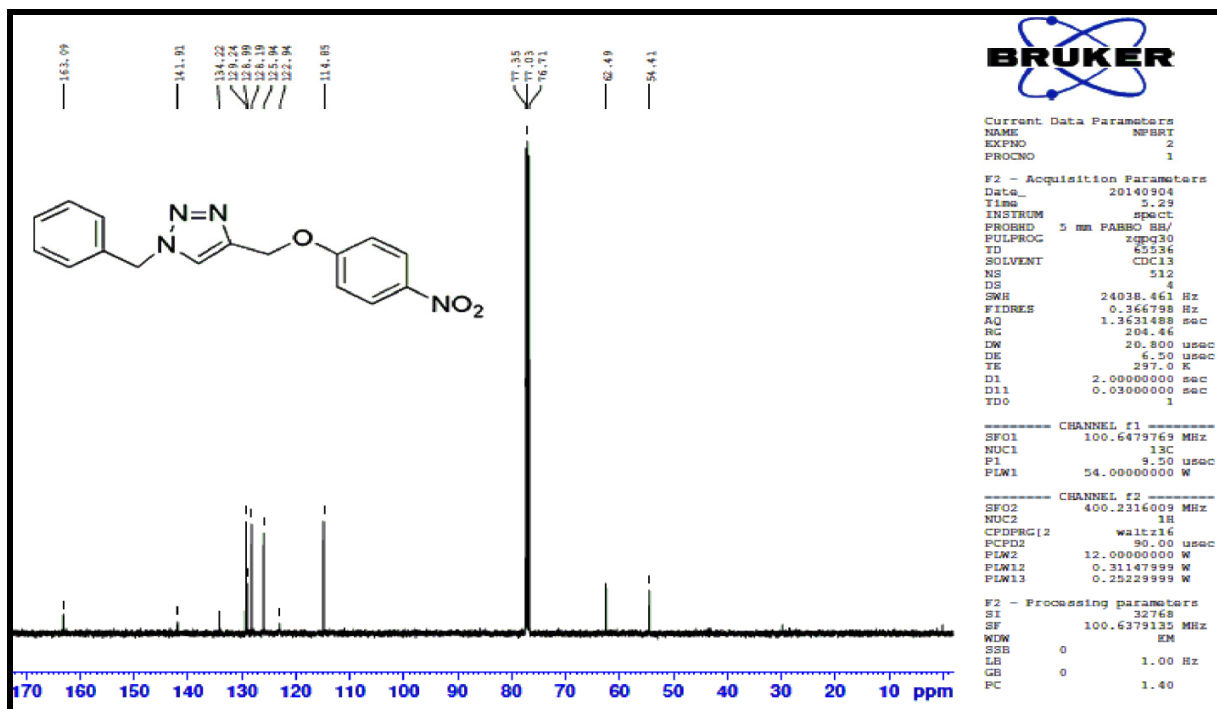

<sup>13</sup>C NMR spectrum of compound **3b**

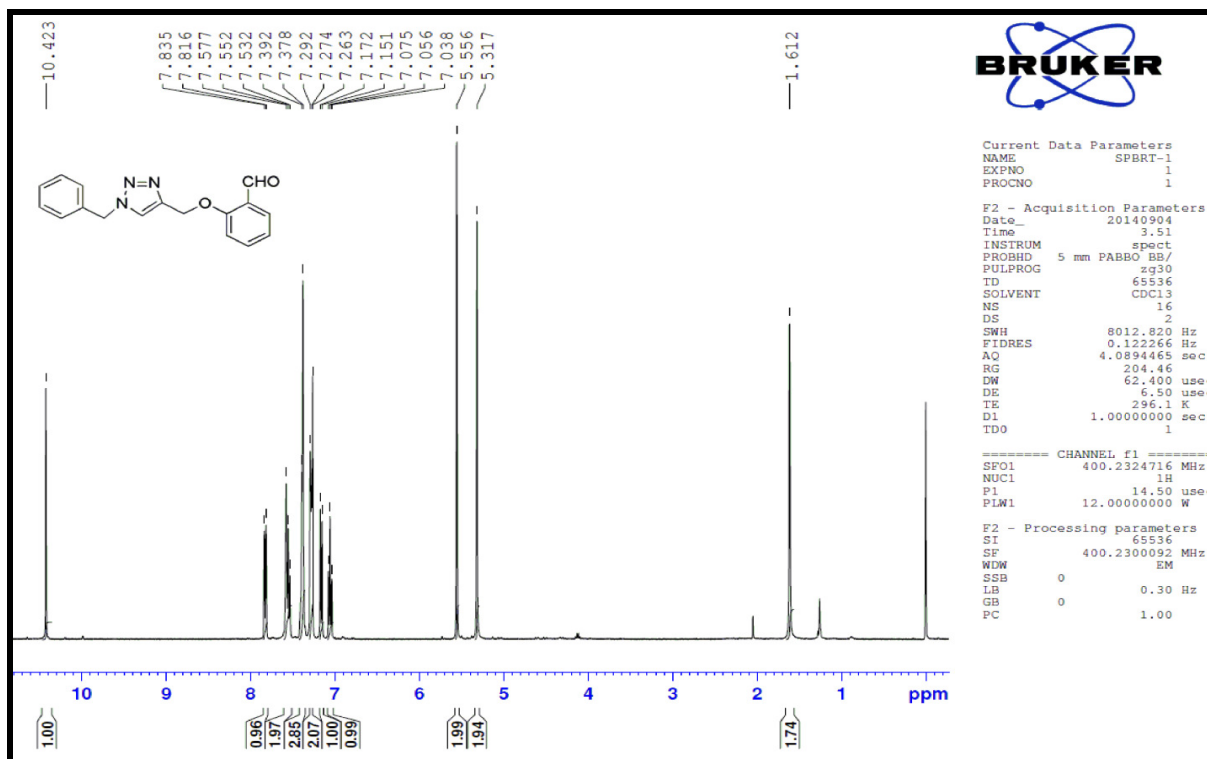

<sup>1</sup>H NMR spectrum of compound **3c**

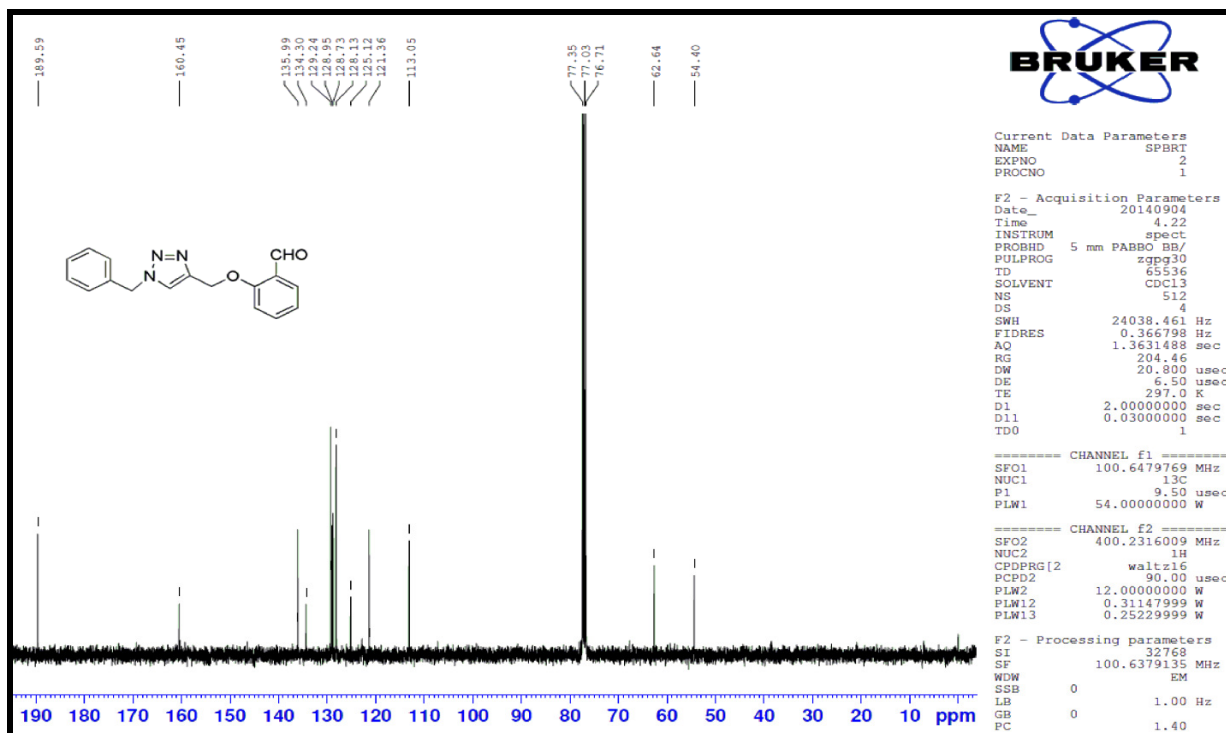

<sup>13</sup>C NMR spectrum of compound **3c**

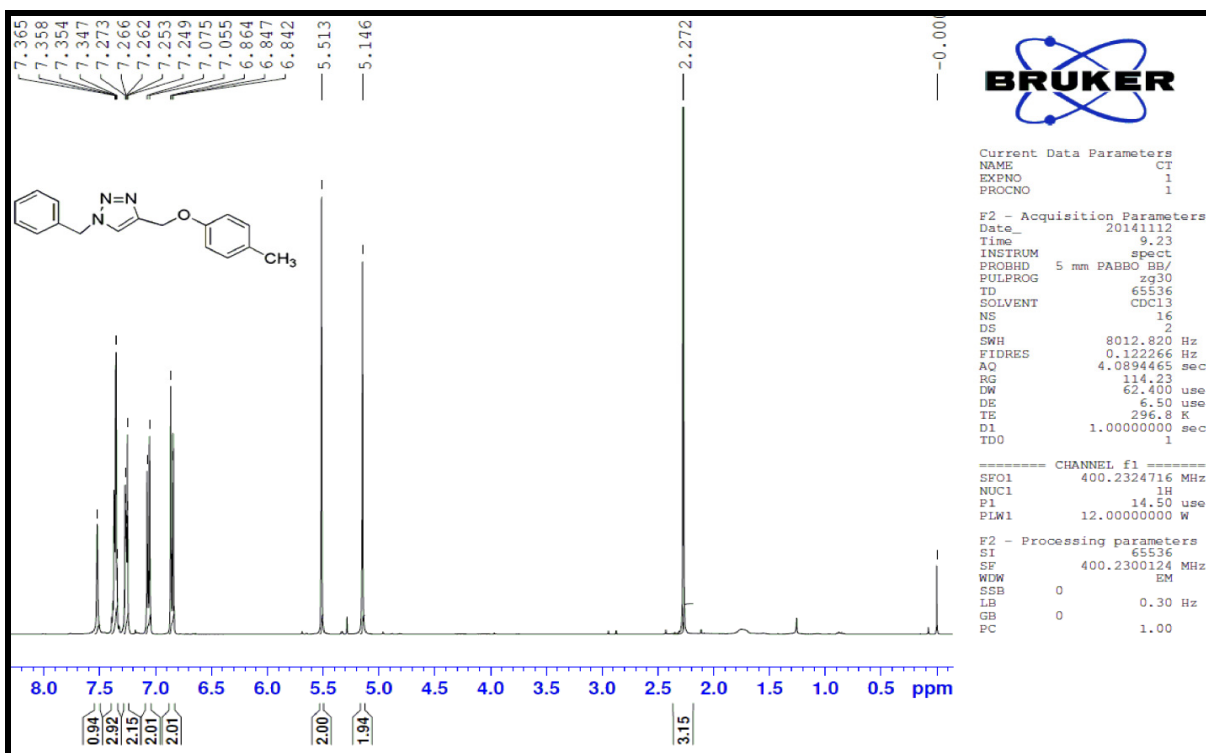

<sup>1</sup>H NMR spectrum of compound **3d**

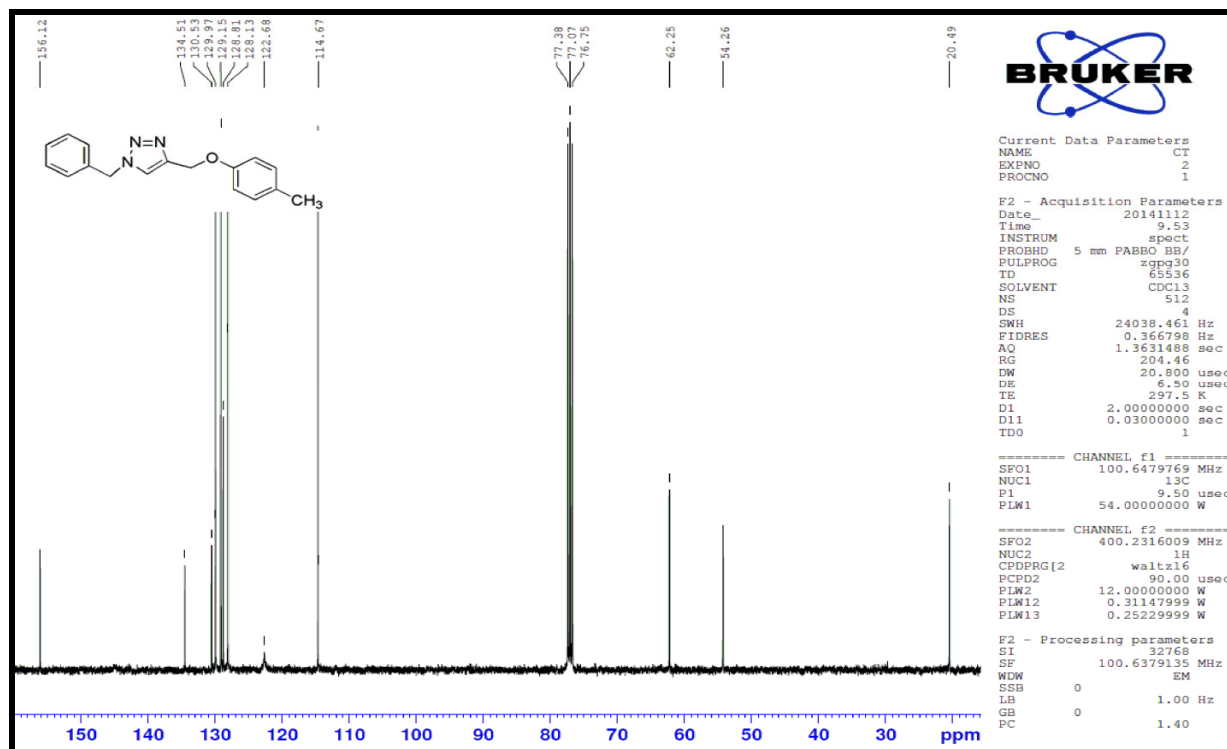

<sup>13</sup>C NMR spectrum of compound **3d**

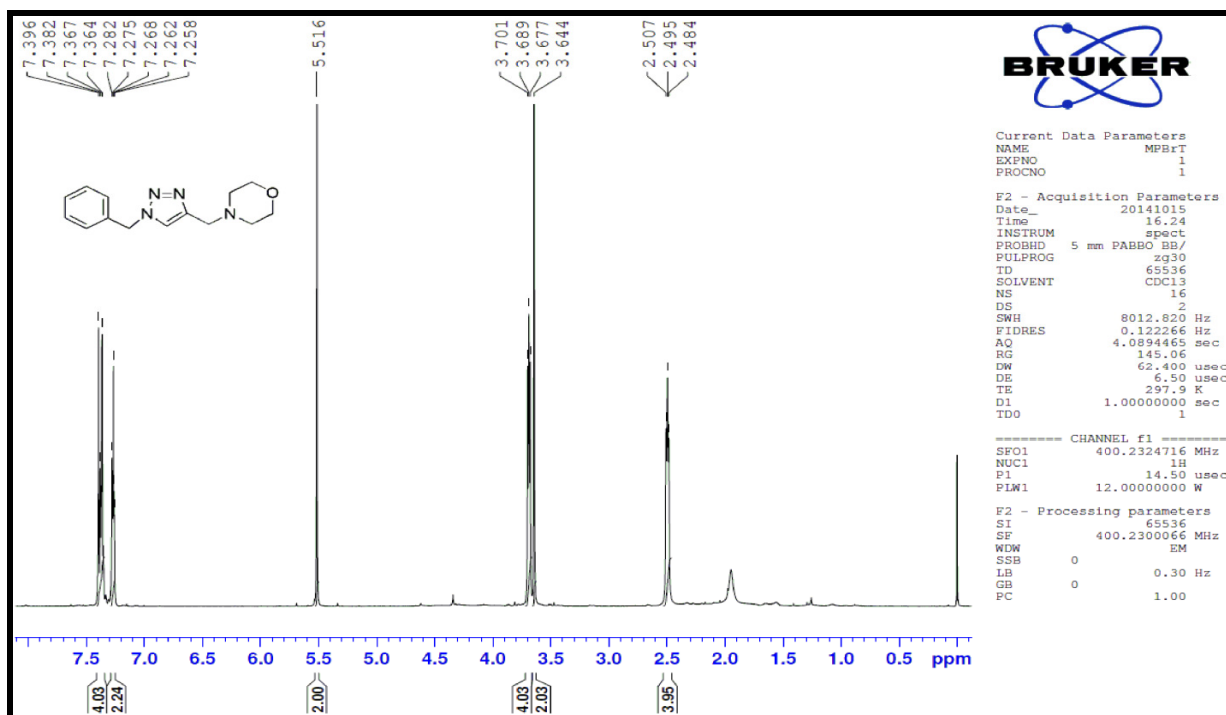

$^1\text{H}$  NMR spectrum of compound **3e**

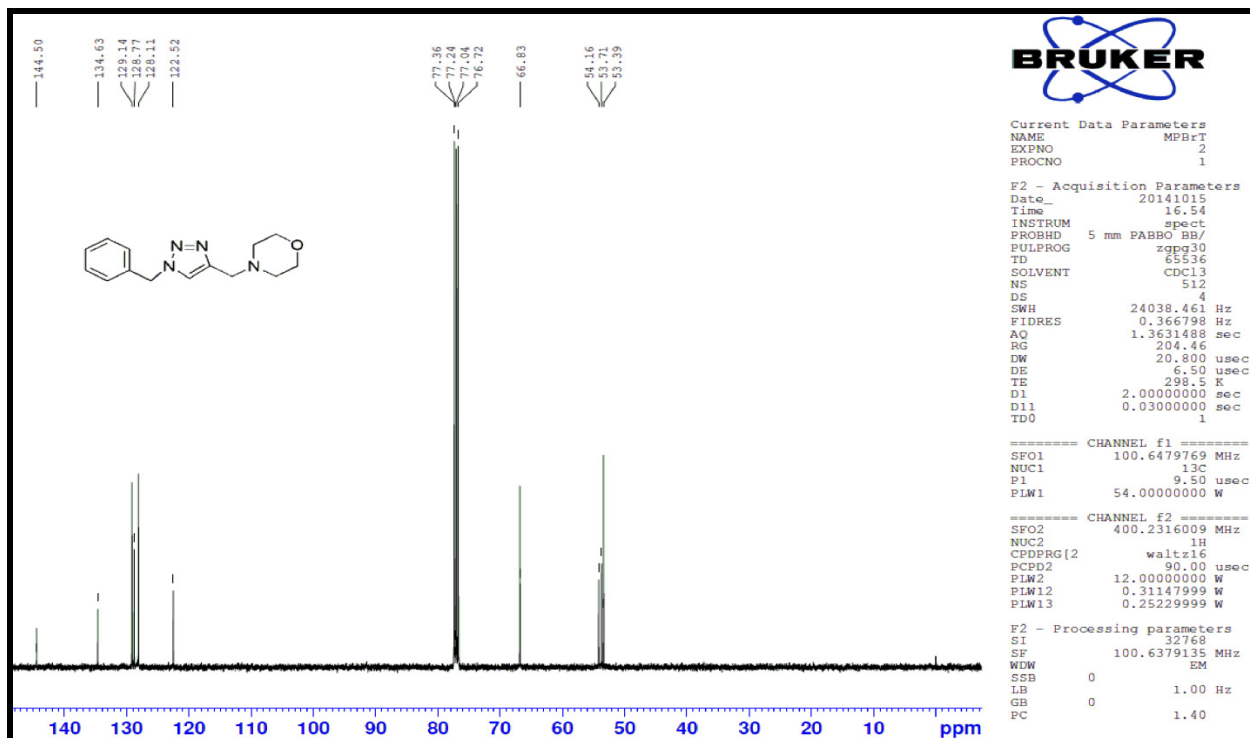

$^{13}\text{C}$  NMR spectrum of compound **3e**

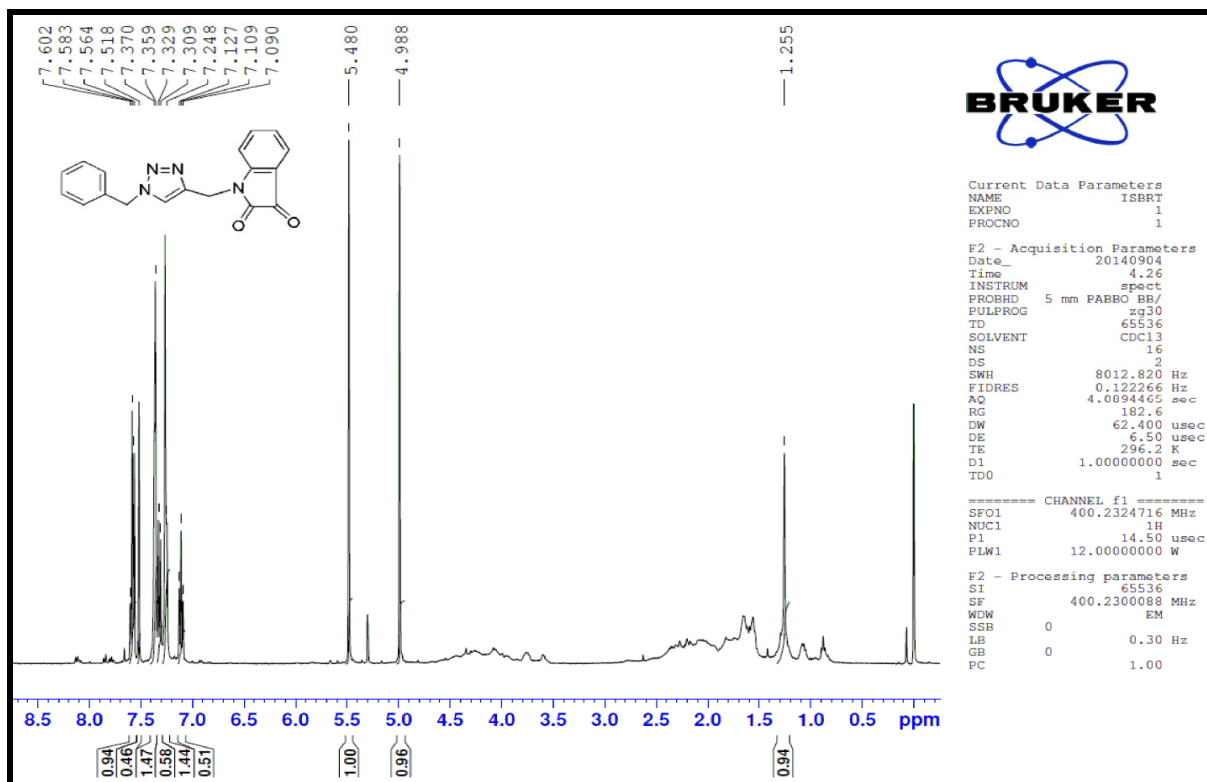

<sup>1</sup>H NMR spectrum of compound 3f

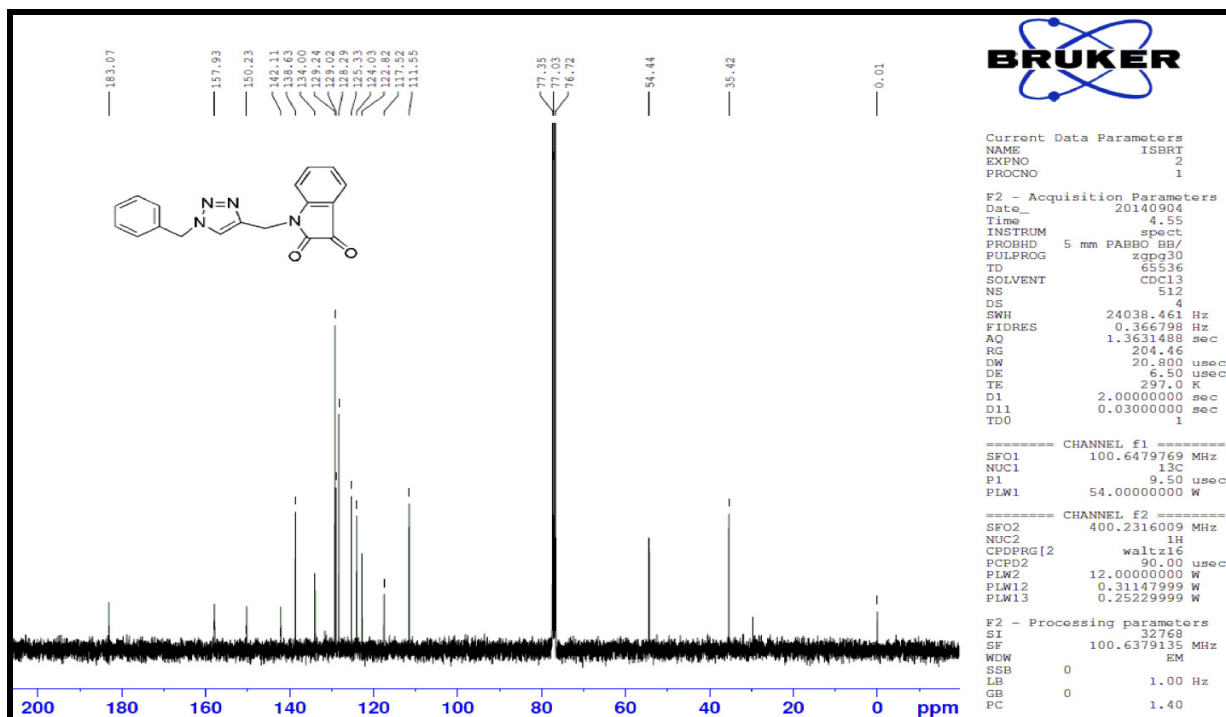

<sup>13</sup>C NMR spectrum of compound 3f

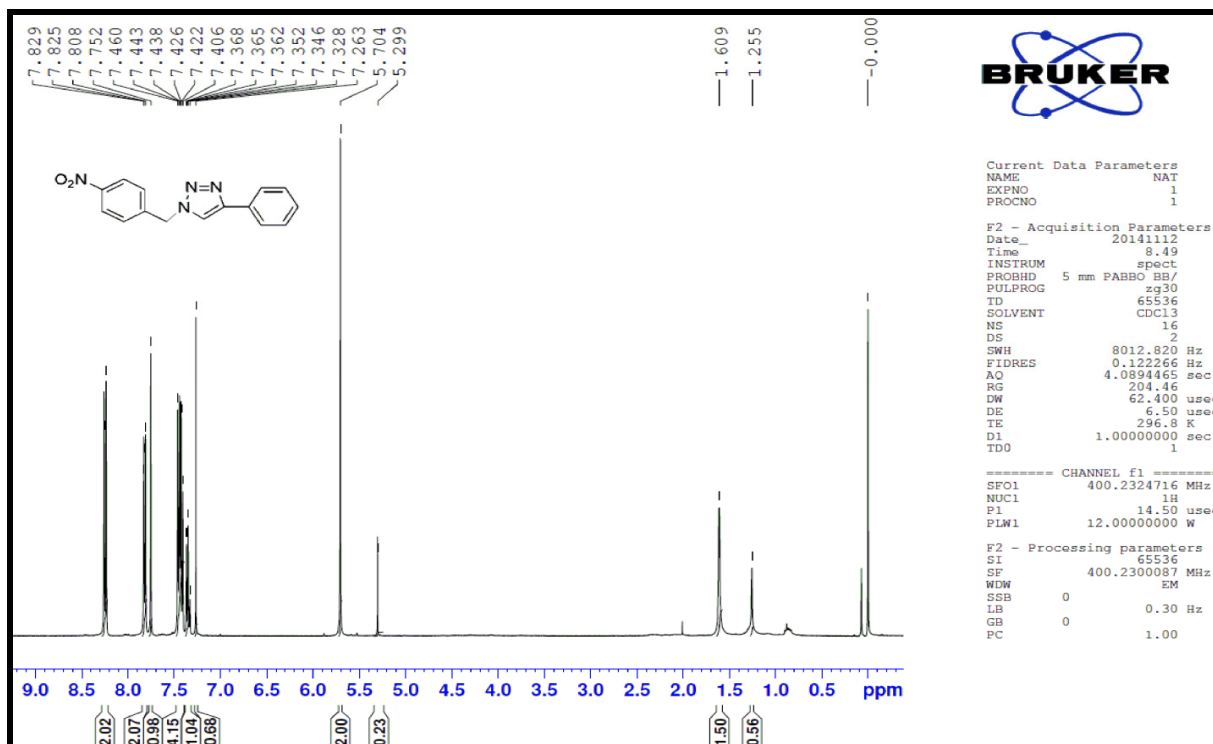

<sup>1</sup>H NMR spectrum of compound **3g**

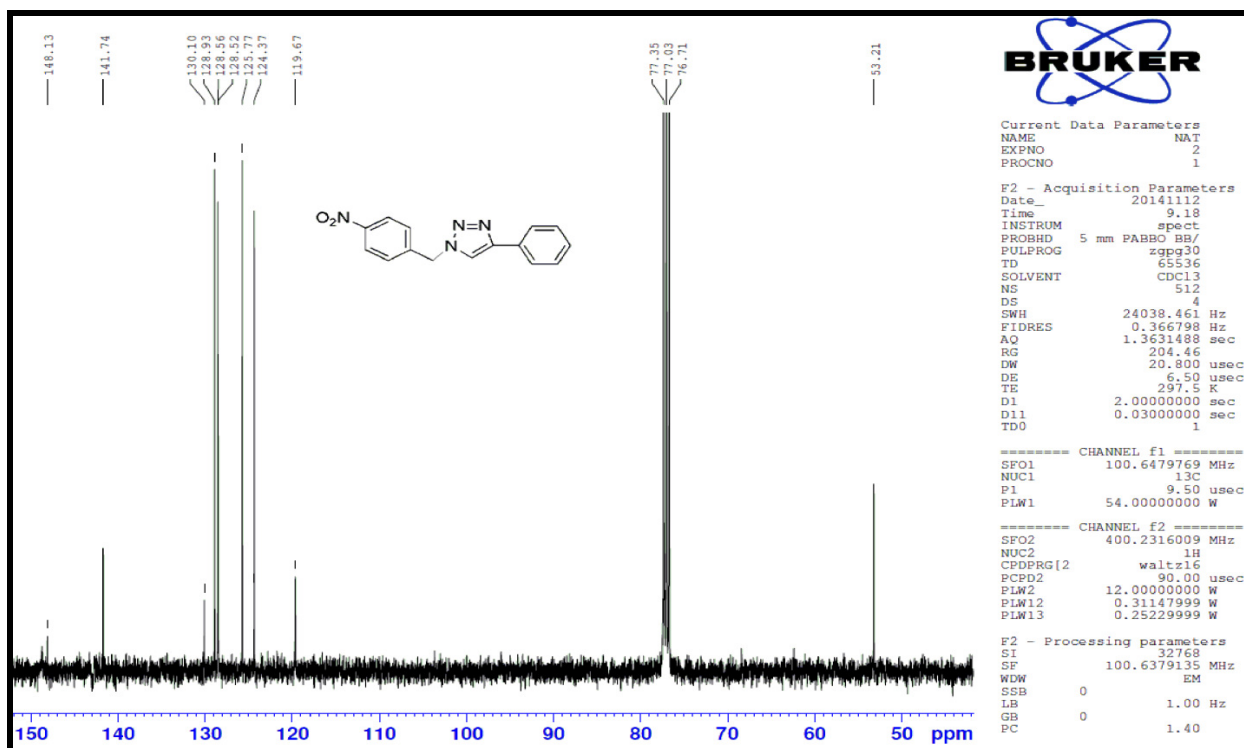

<sup>13</sup>C NMR spectrum of compound **3g**



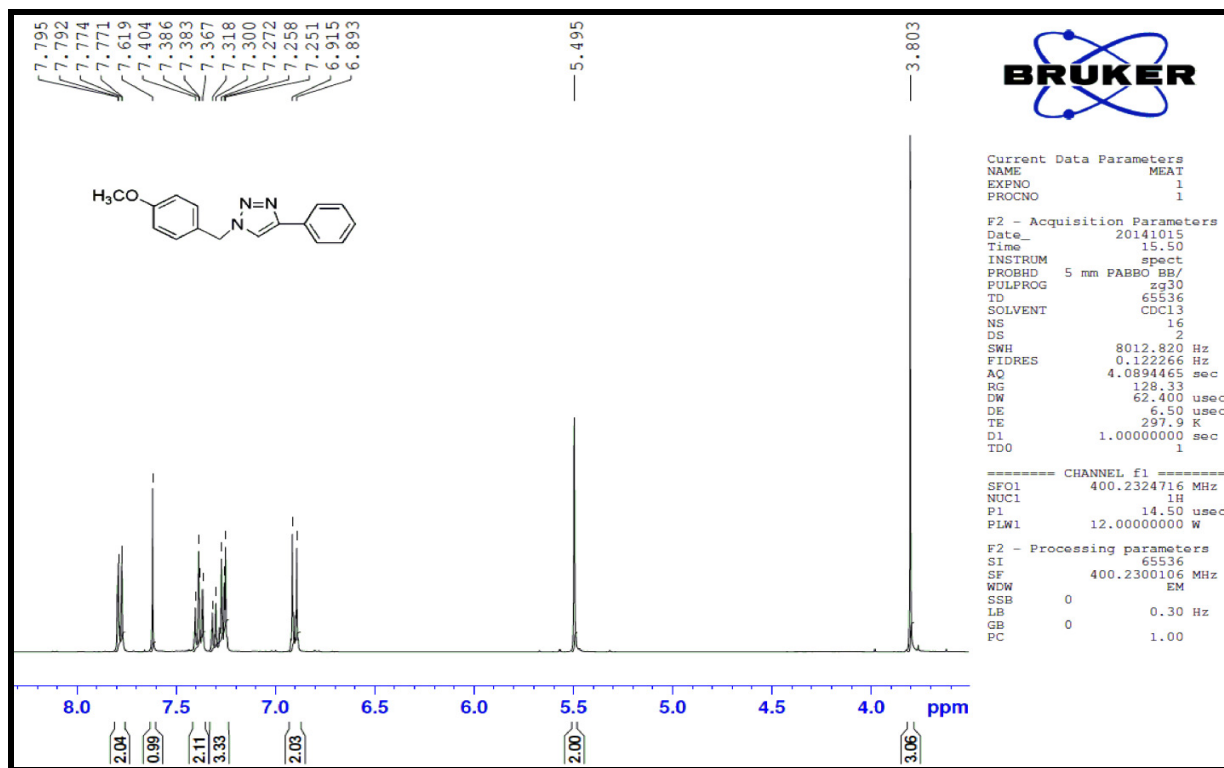

<sup>1</sup>H NMR spectrum of compound 3h

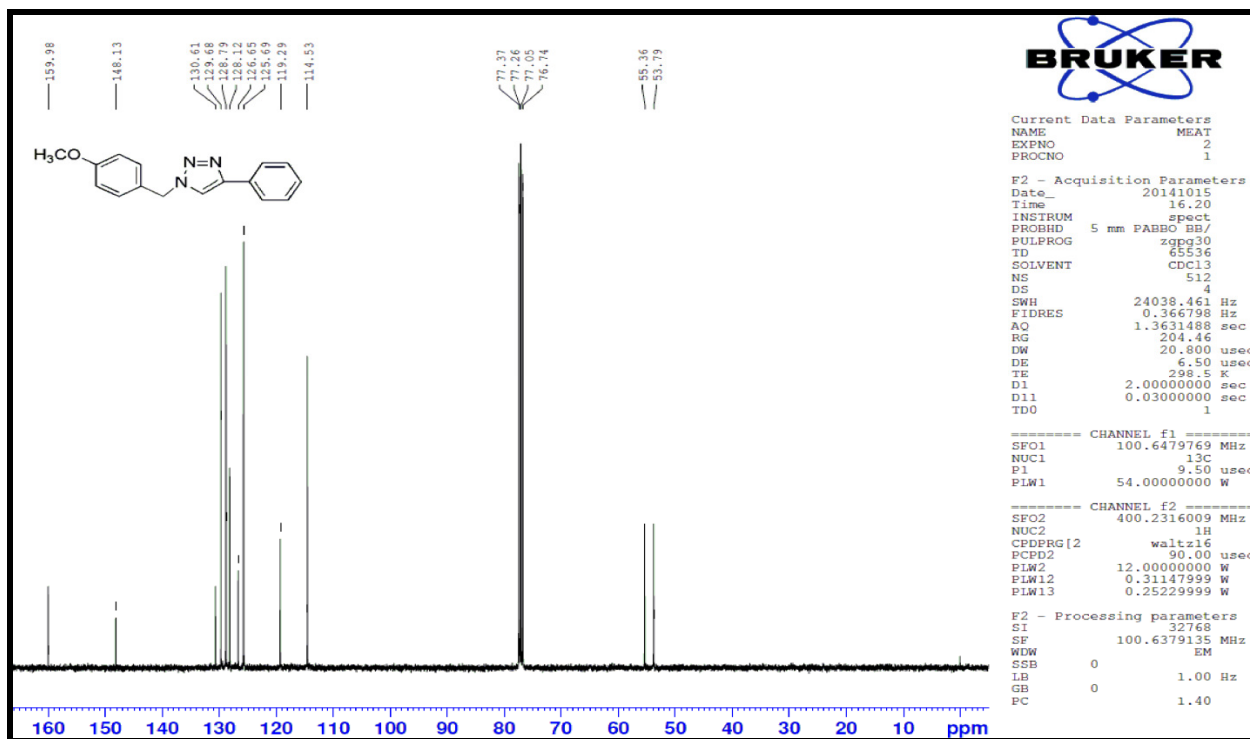

<sup>13</sup>C NMR spectrum of compound 3h

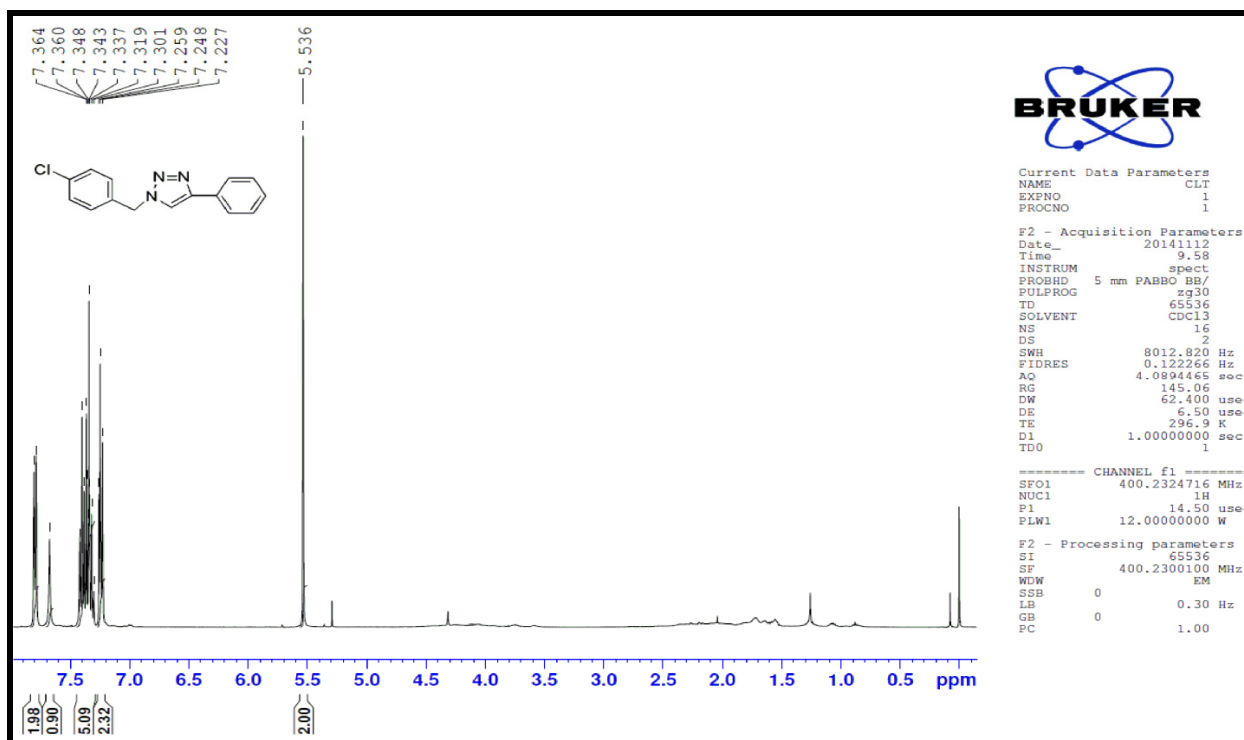

$^1\text{H}$  NMR spectrum of compound **3i**

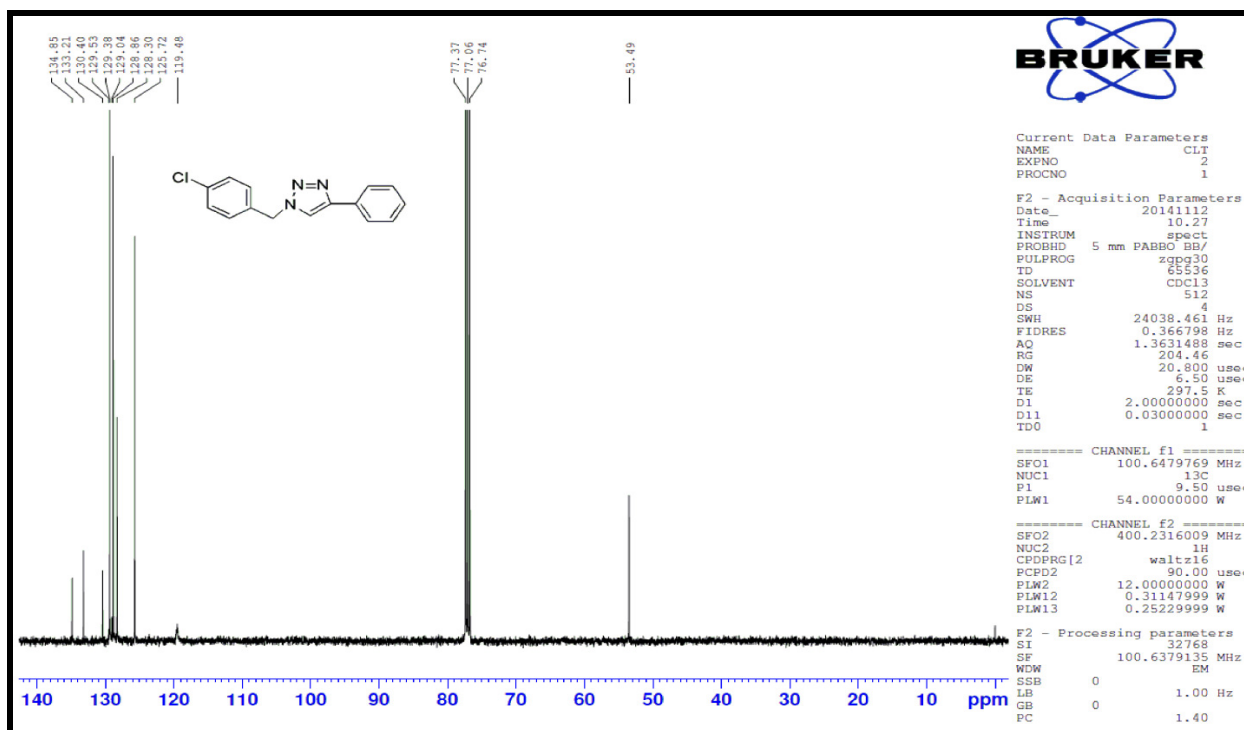

$^{13}\text{C}$  NMR spectrum of compound **3i**

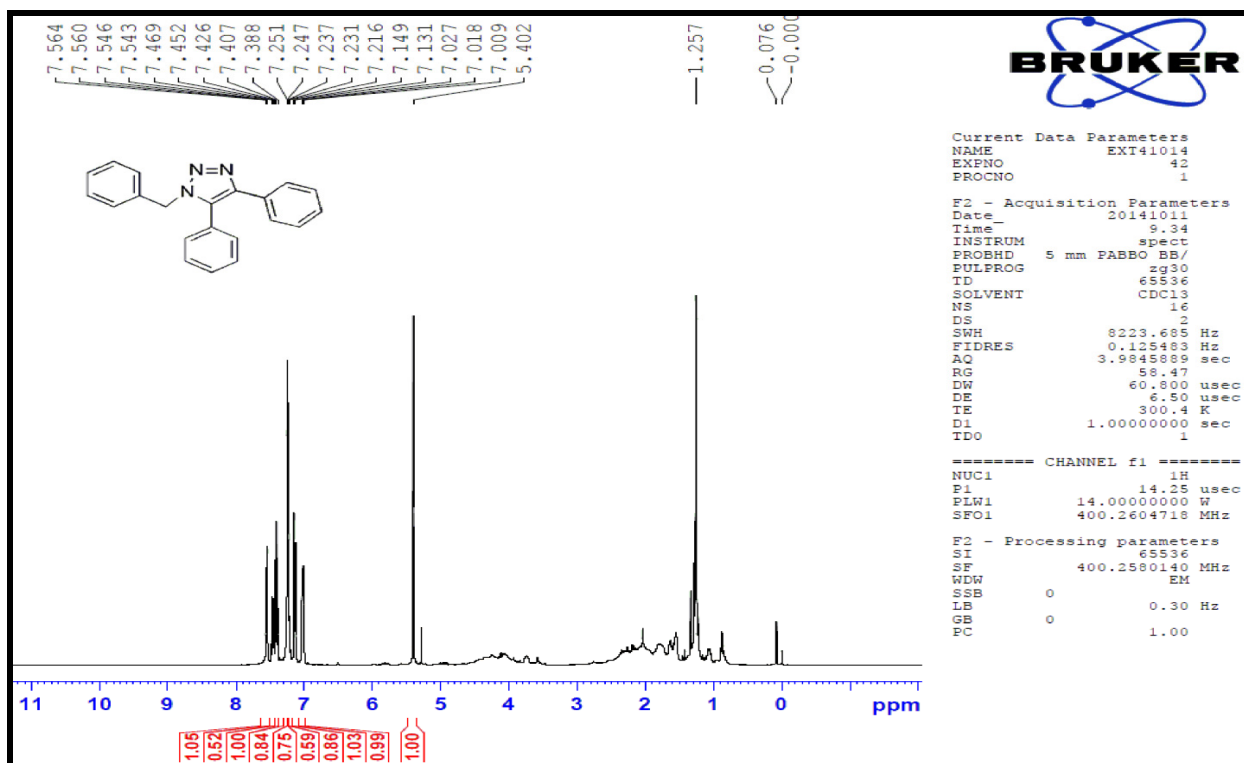

<sup>1</sup>H NMR spectrum of compound **3j**

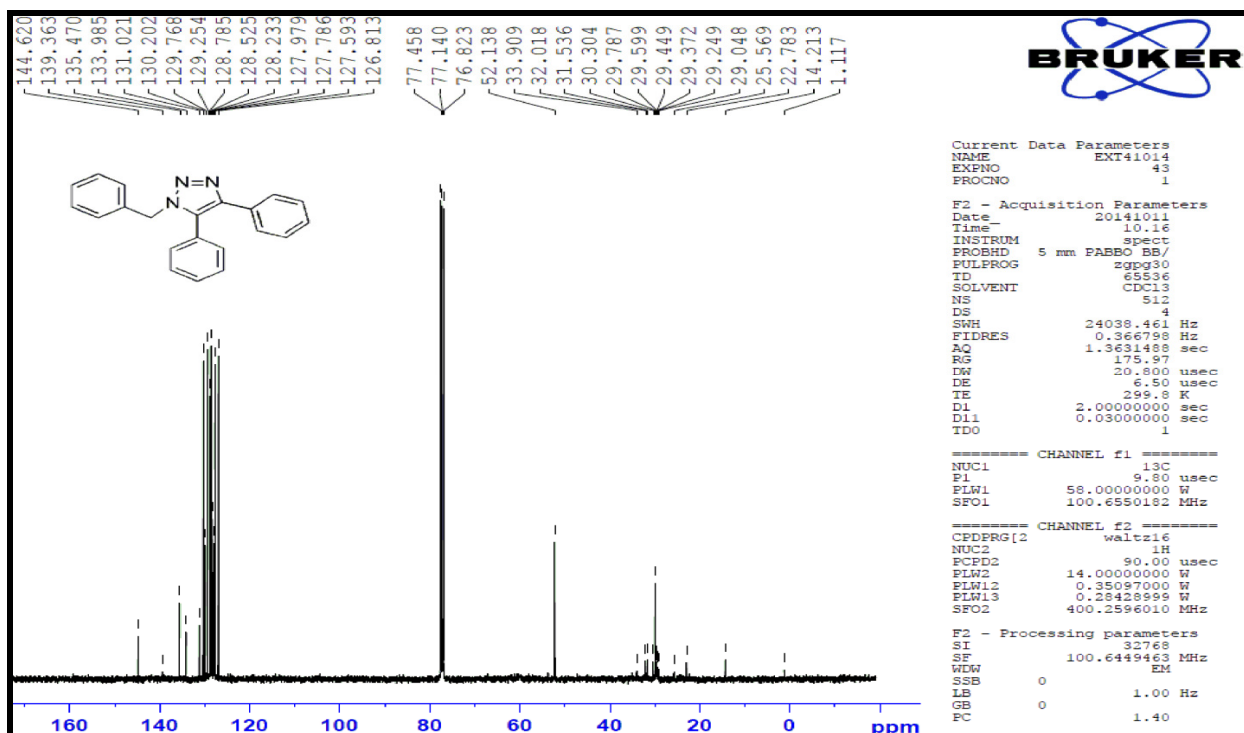

<sup>13</sup>C NMR spectrum of compound **3j**

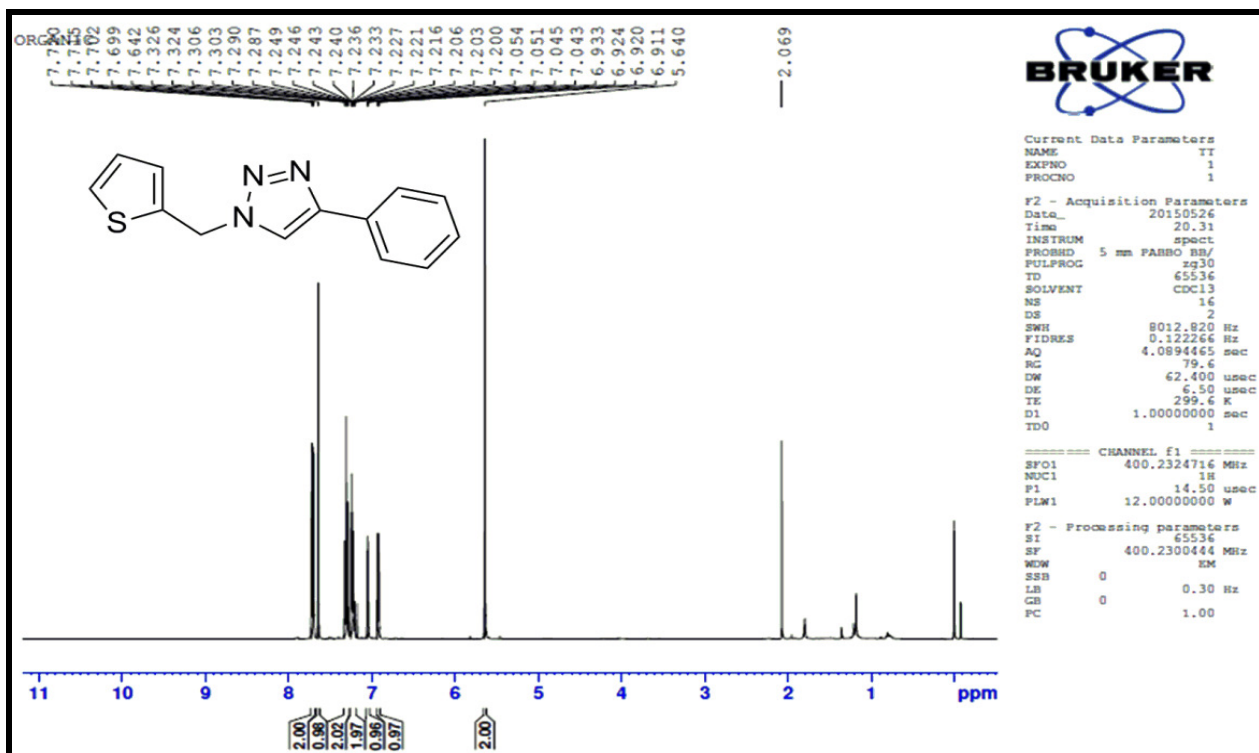

$^1\text{H}$  NMR spectrum of compound **3k**

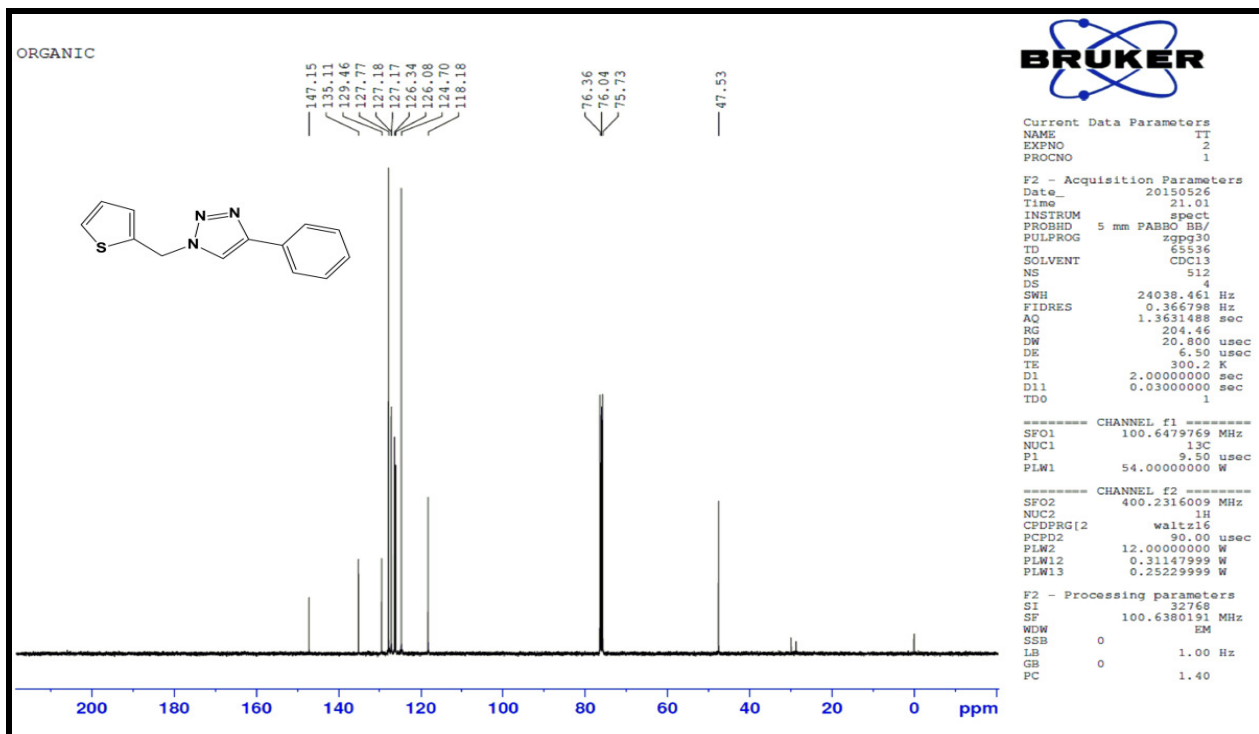

$^{13}\text{C}$  NMR spectrum of compound **3k**

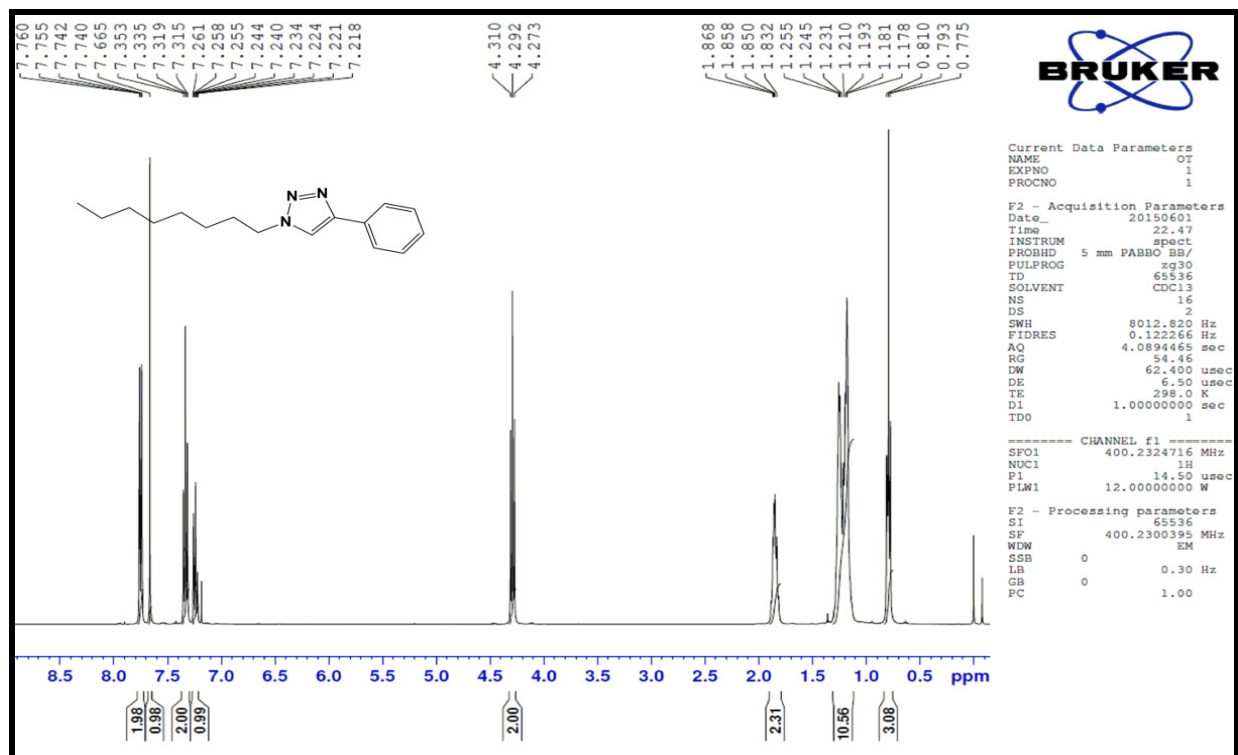

<sup>1</sup>H NMR spectrum of compound 31

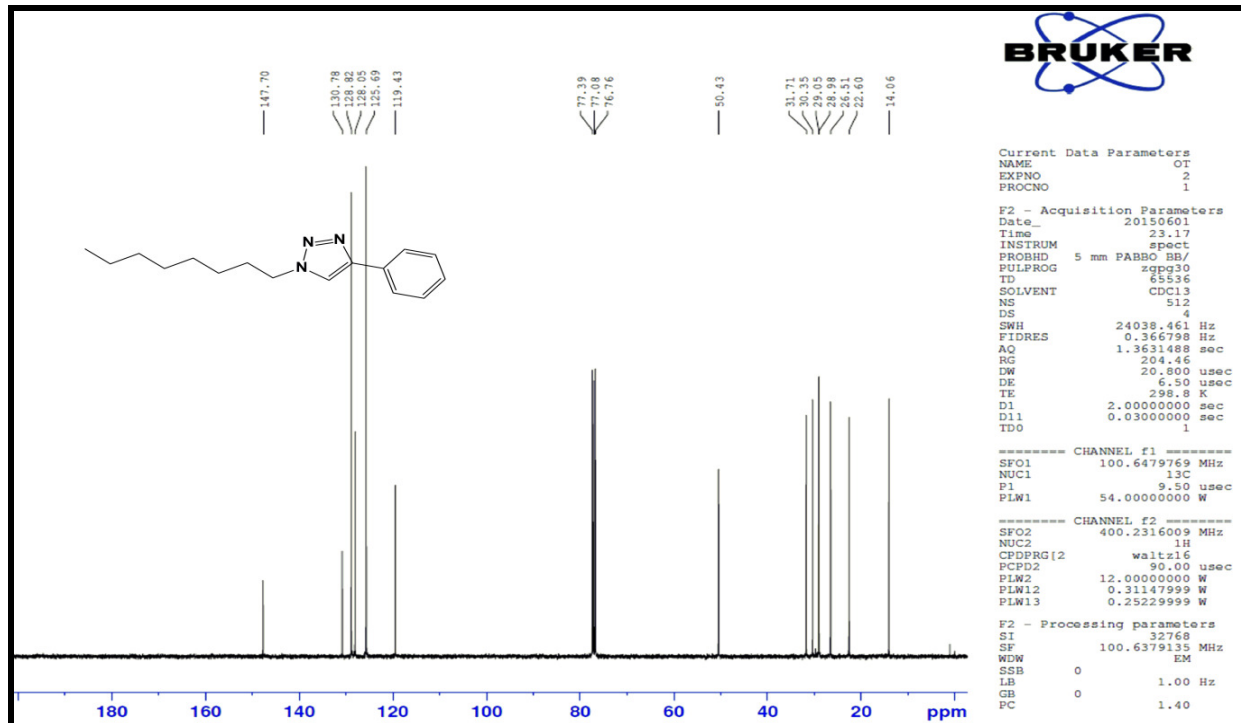

<sup>13</sup>C NMR spectrum of compound 31

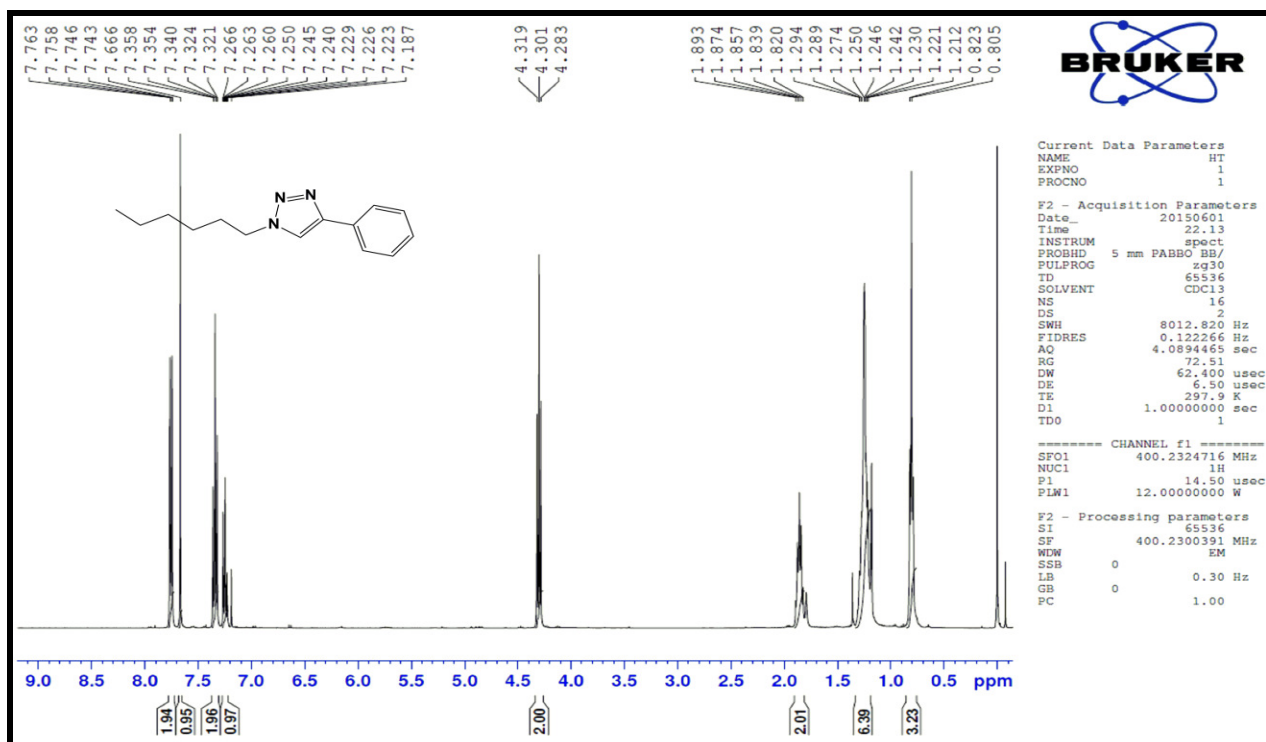

<sup>1</sup>H NMR spectrum of compound **3m**

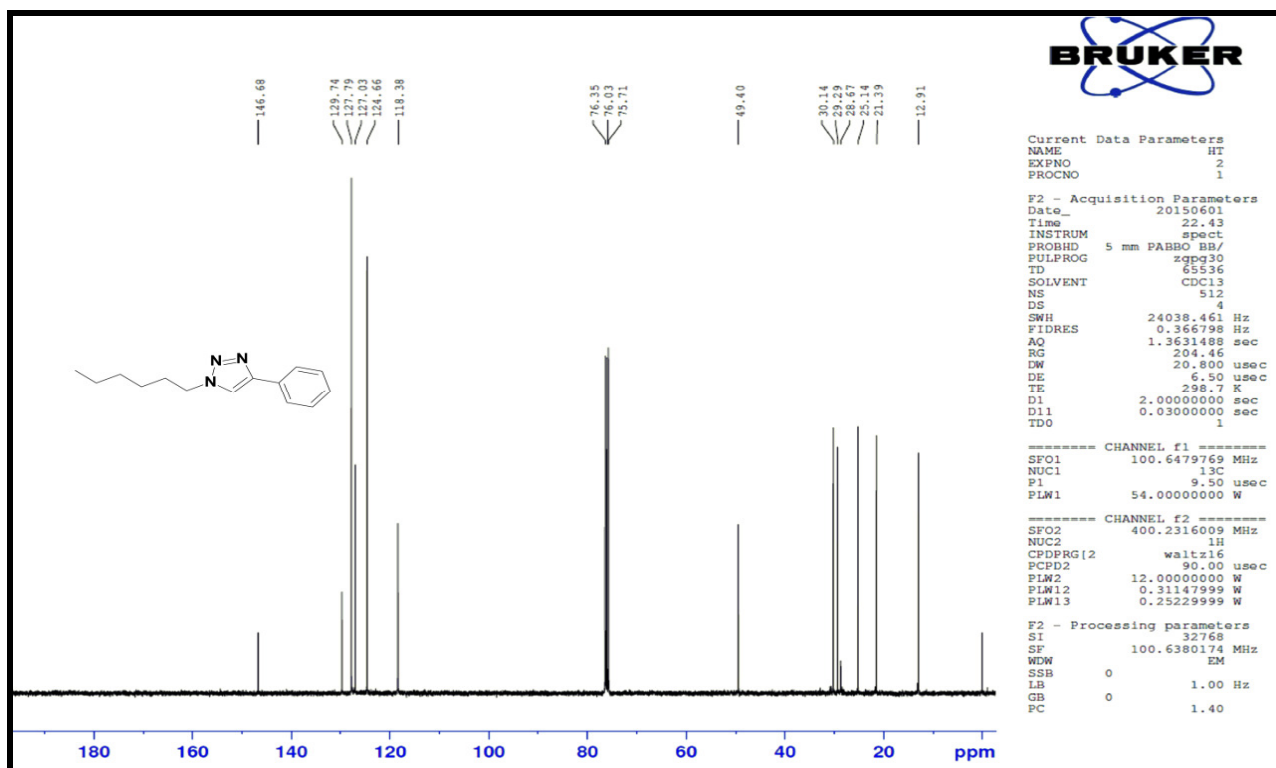

<sup>13</sup>C NMR spectrum of compound **3m**

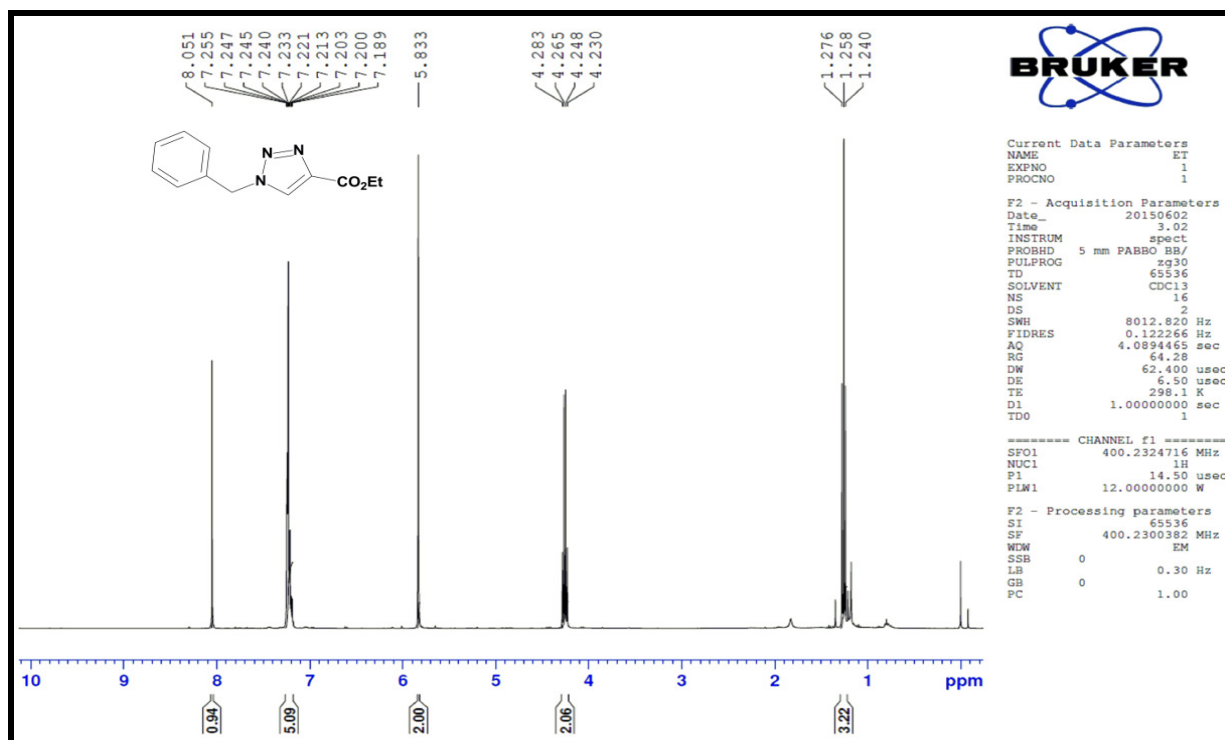

<sup>1</sup>H NMR spectrum of compound **3n**

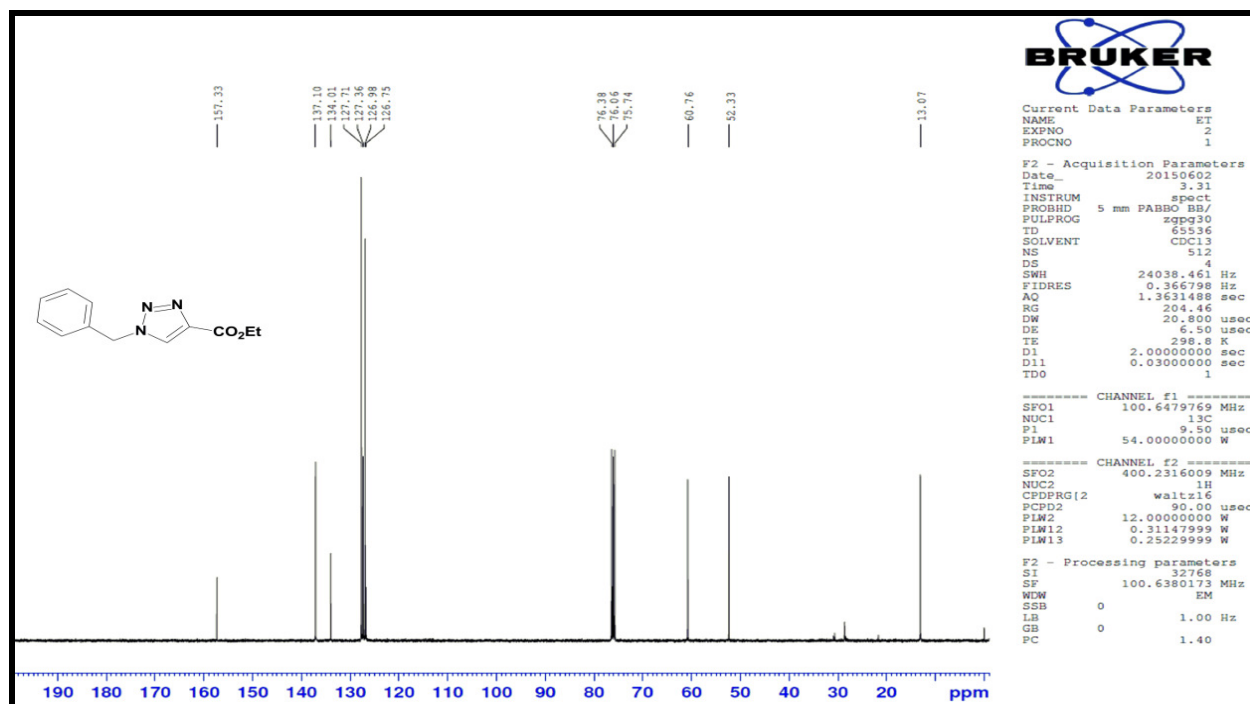

<sup>13</sup>C NMR spectrum of compound **3n**

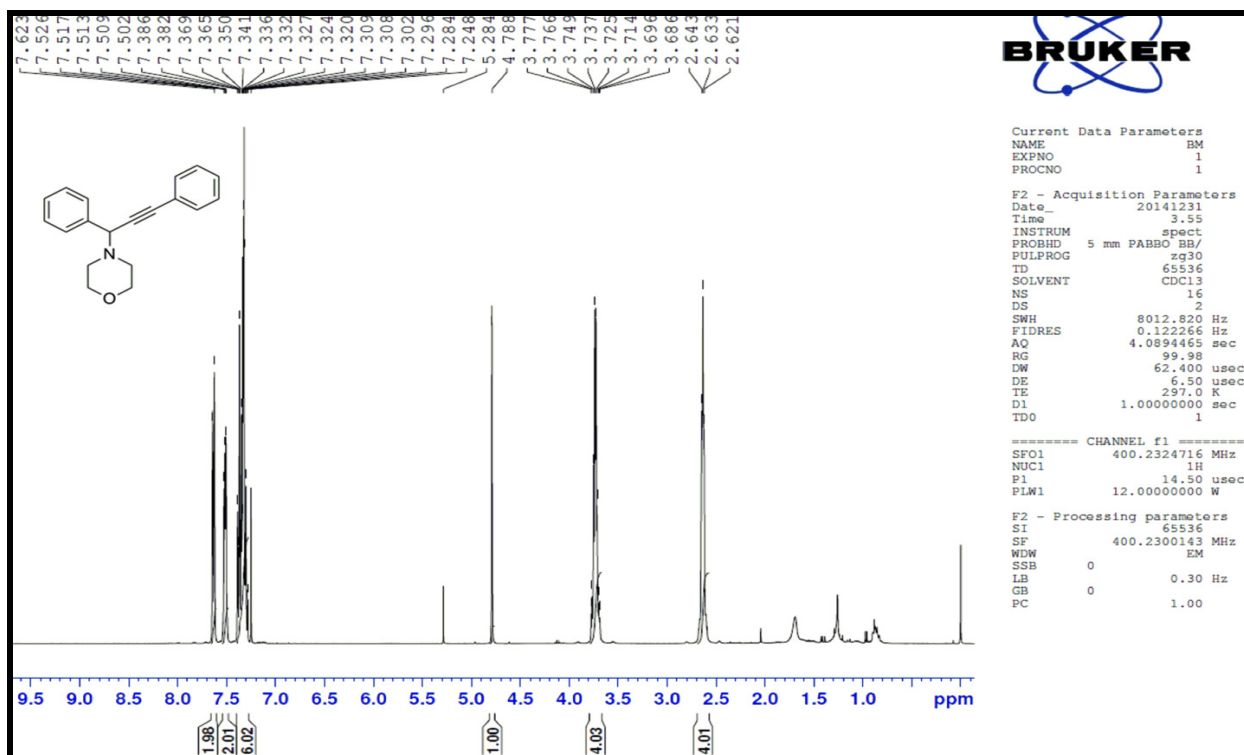

<sup>1</sup>H NMR spectrum of compound 7a

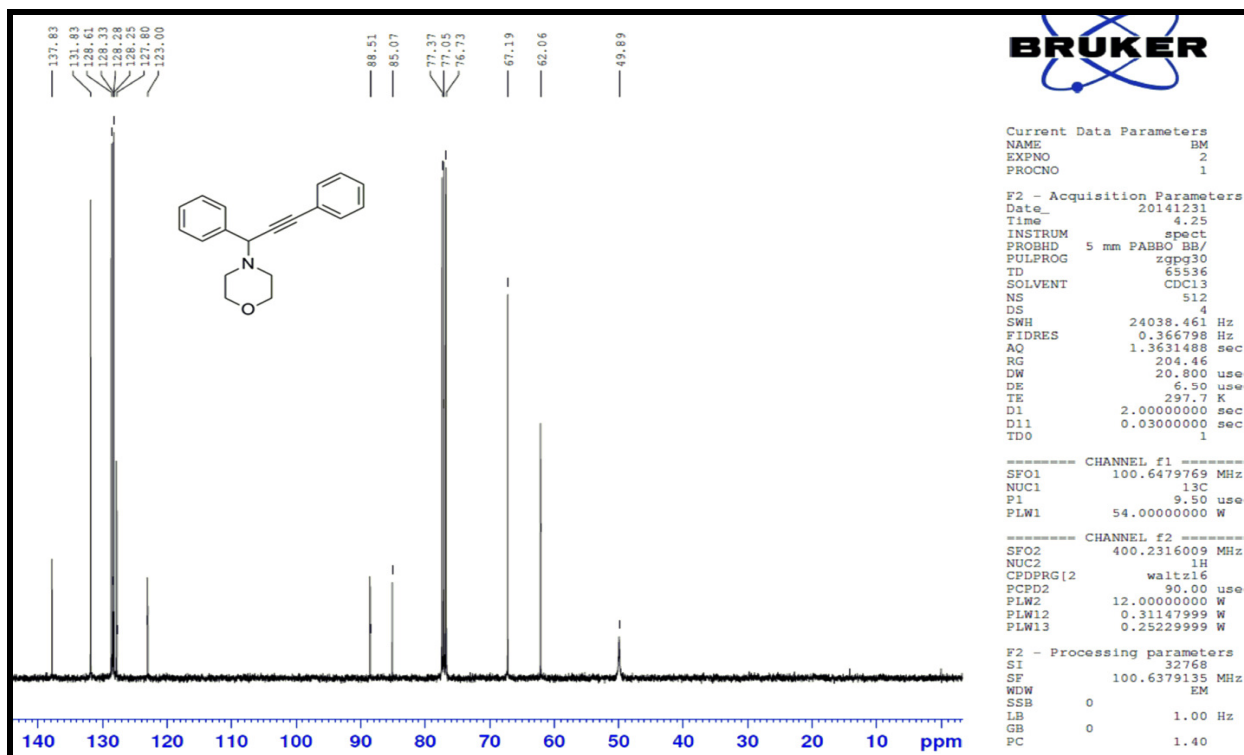

<sup>13</sup>C NMR spectrum of compound 7a



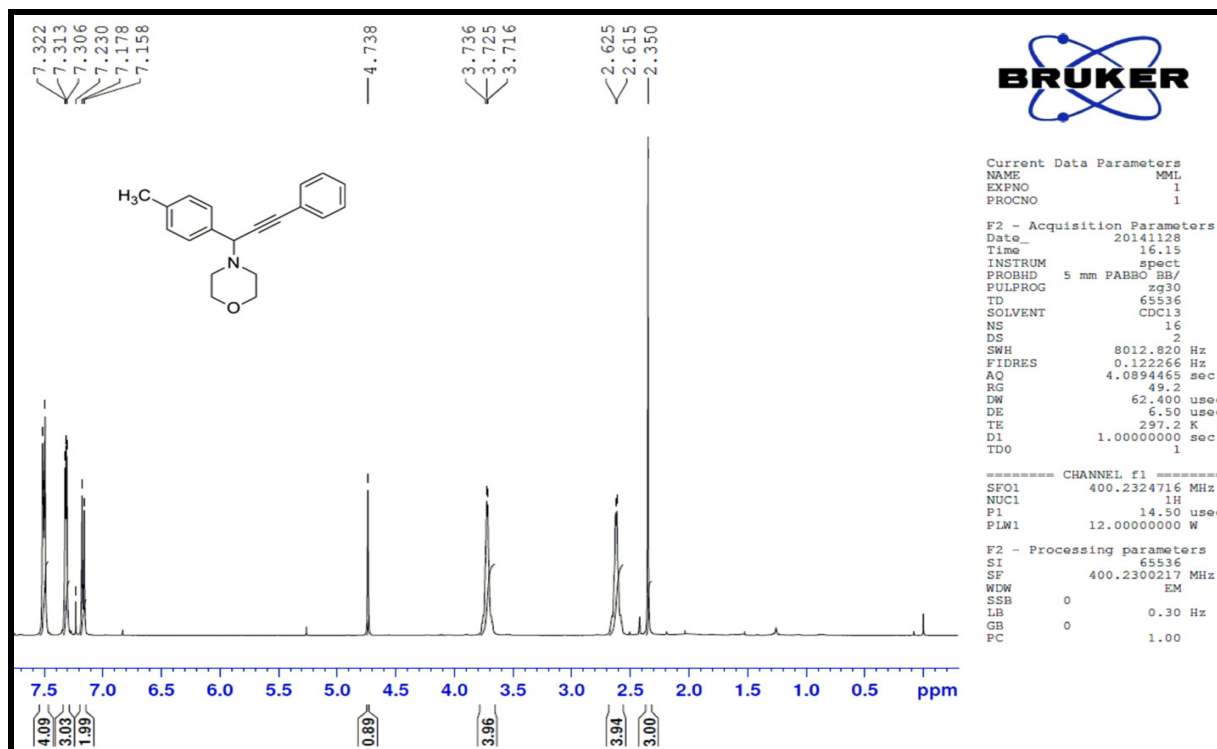

<sup>1</sup>H NMR spectrum of compound 7b

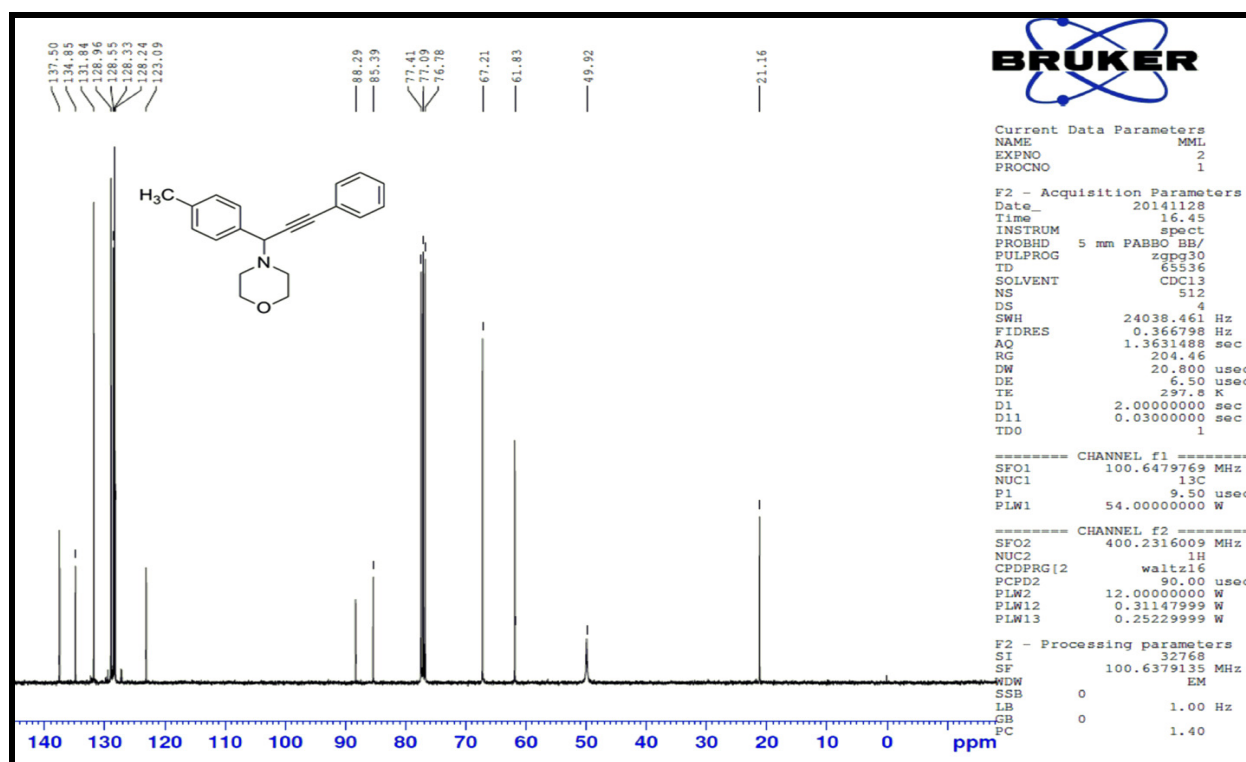

<sup>13</sup>C NMR spectrum of compound 7b

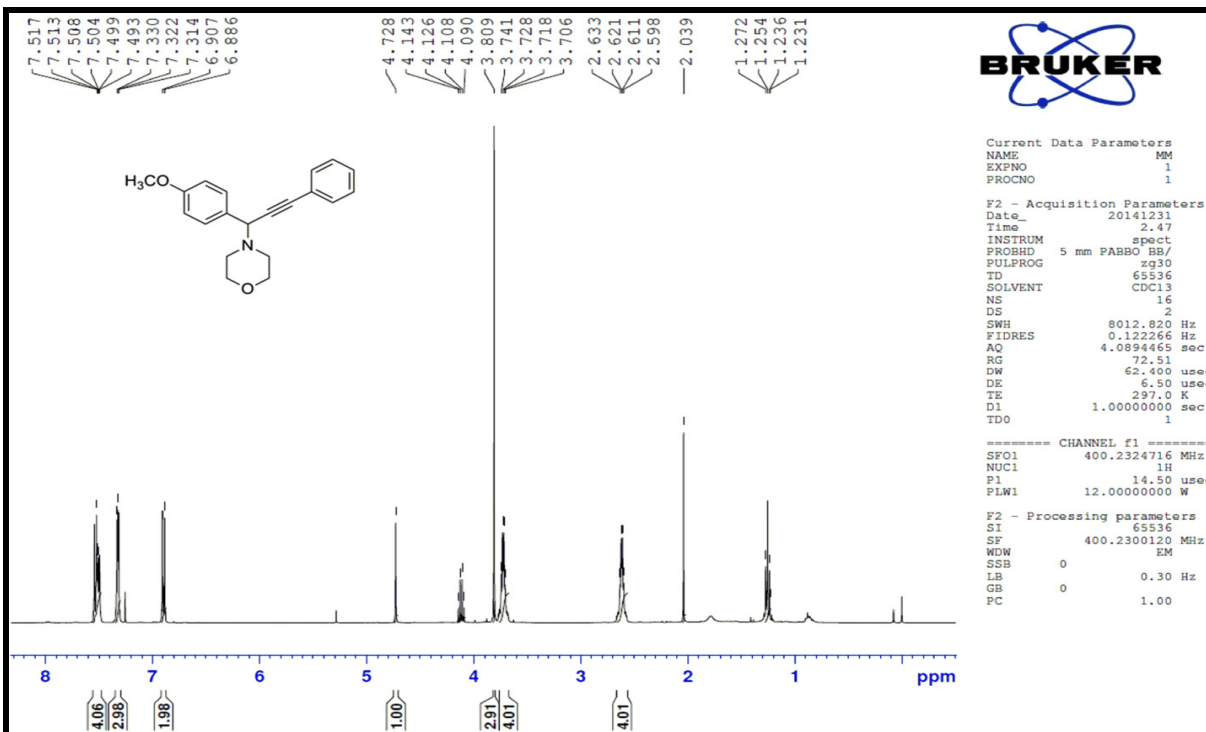

$^1\text{H}$  NMR spectrum of compound **7c**

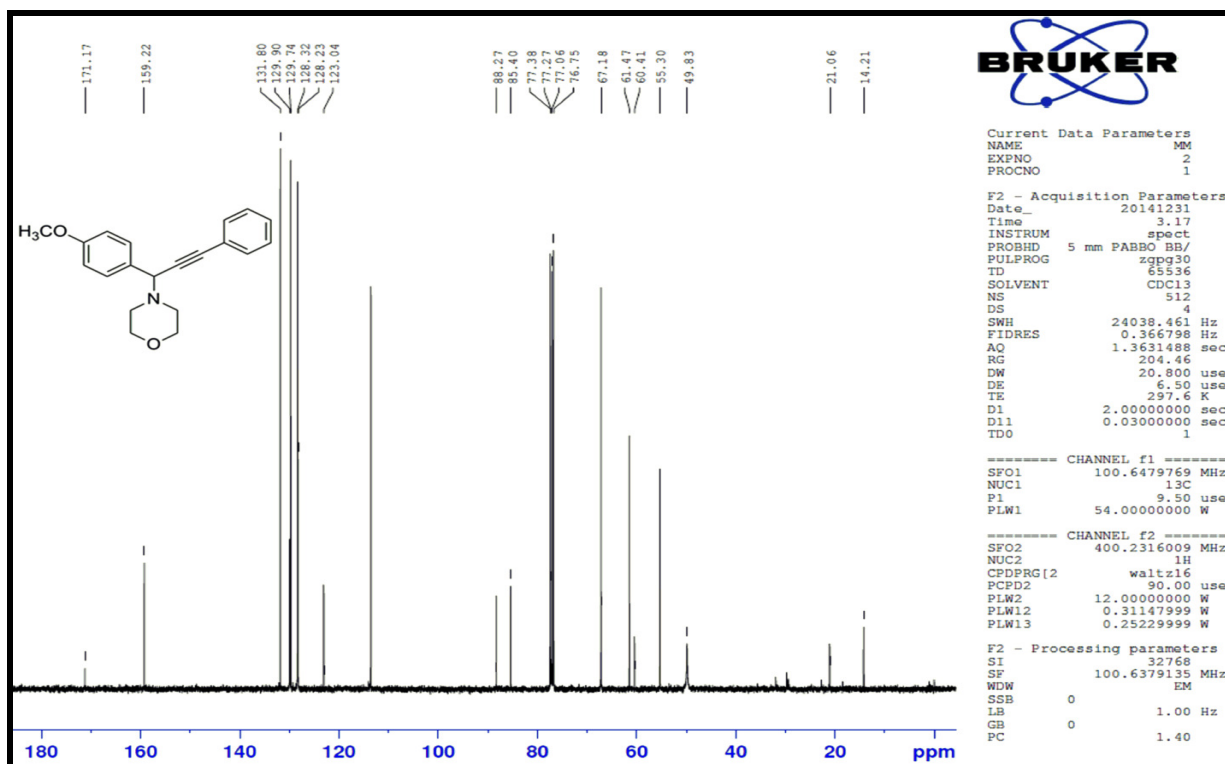

$^{13}\text{C}$  NMR spectrum of compound **7c**

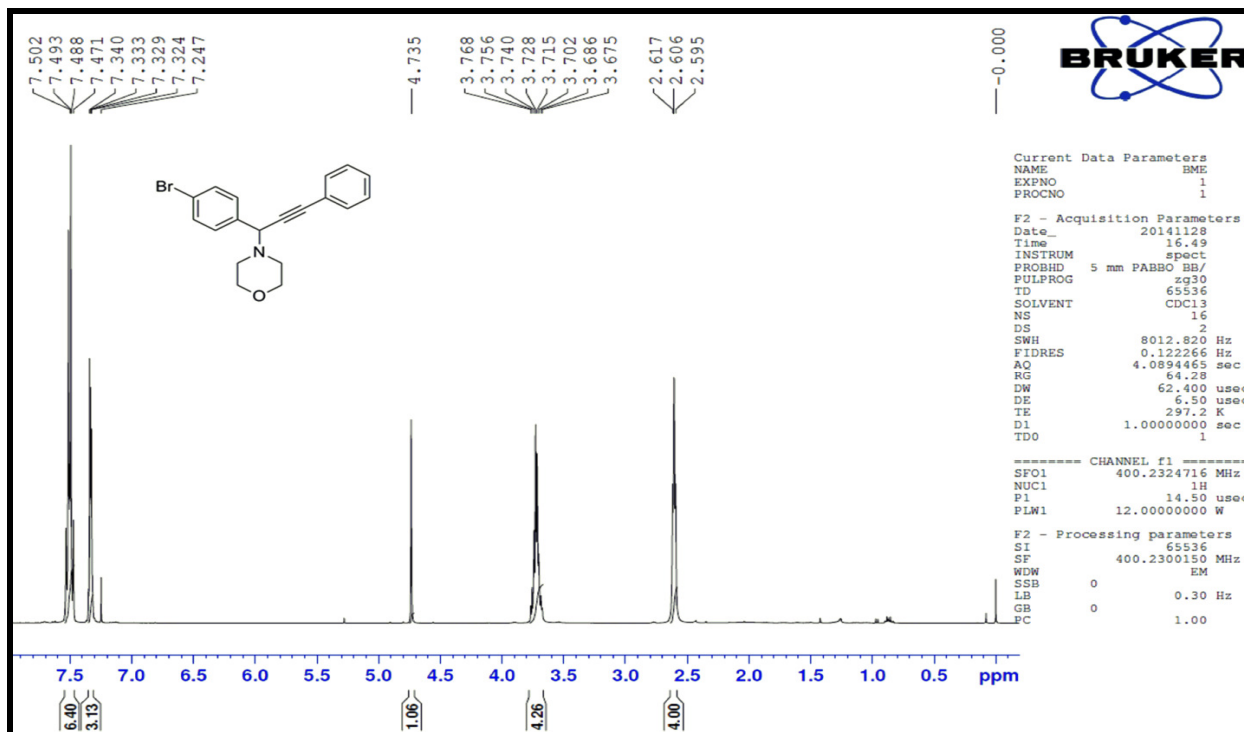

<sup>1</sup>H NMR spectrum of compound 7d

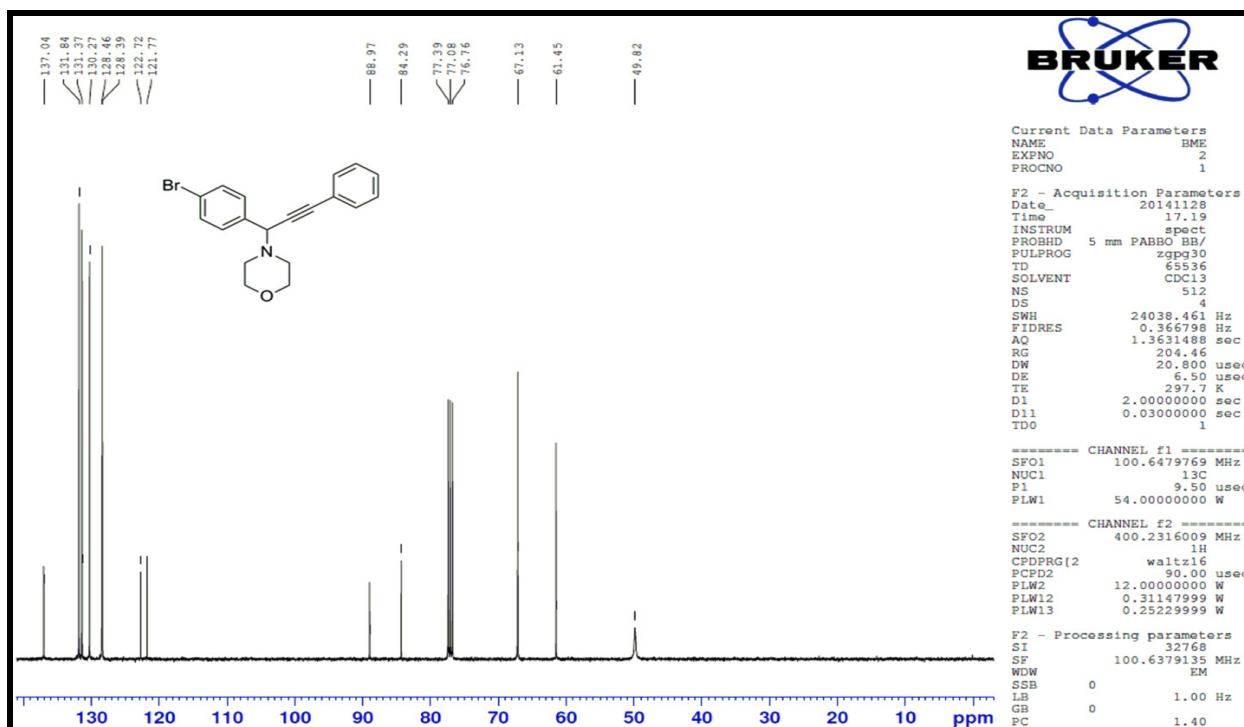

<sup>13</sup>C NMR spectrum of compound 7d

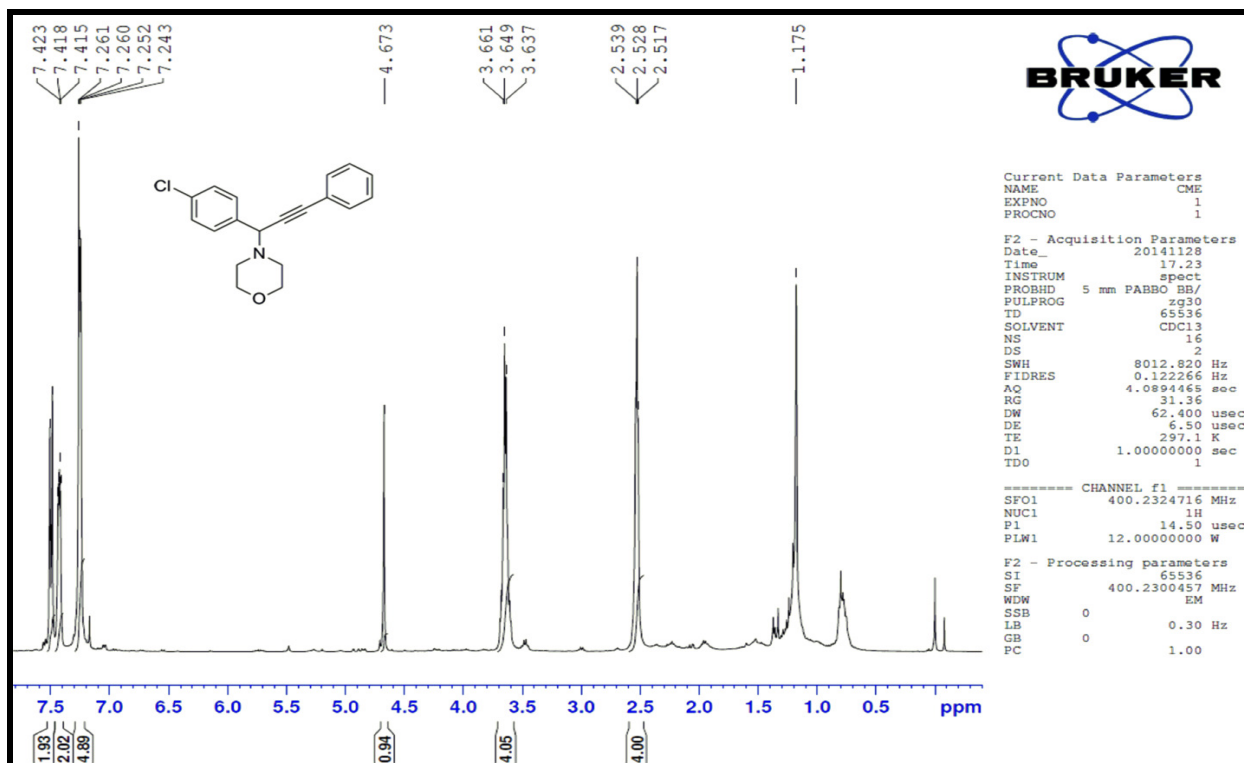

$^1\text{H}$  NMR spectrum of compound **7e**

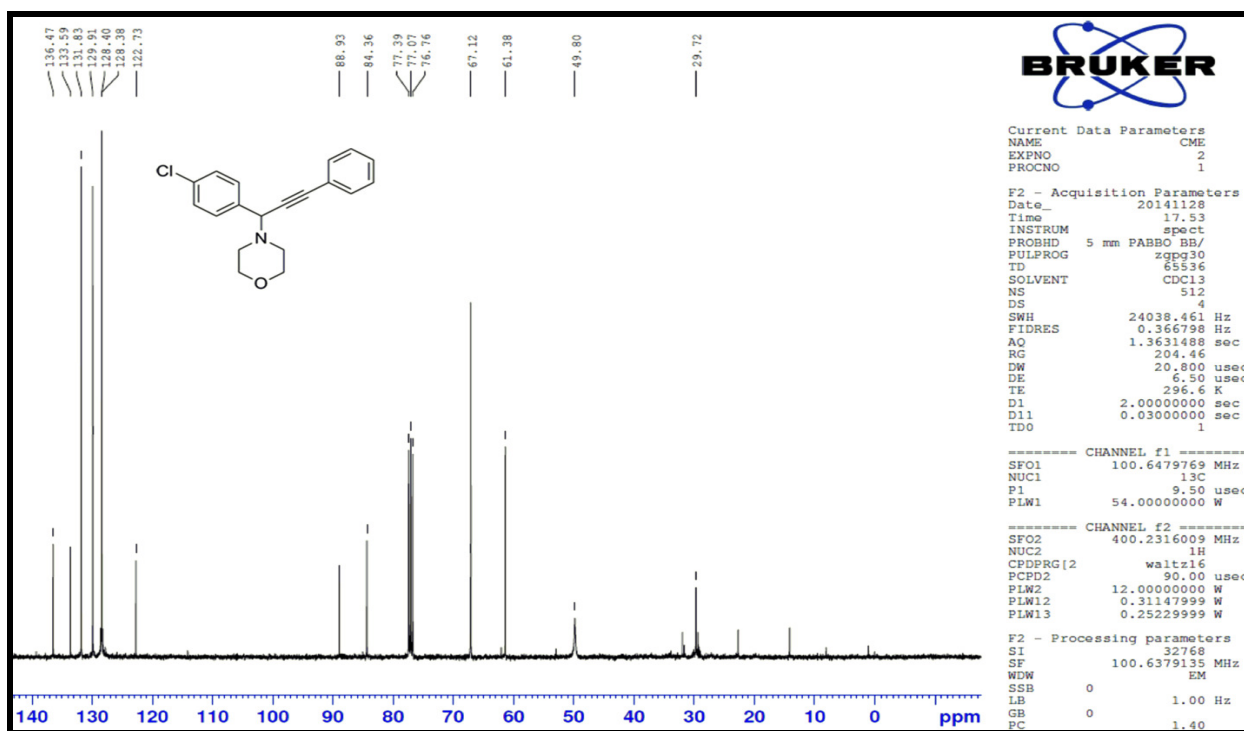

$^{13}\text{C}$  NMR spectrum of compound **7e**

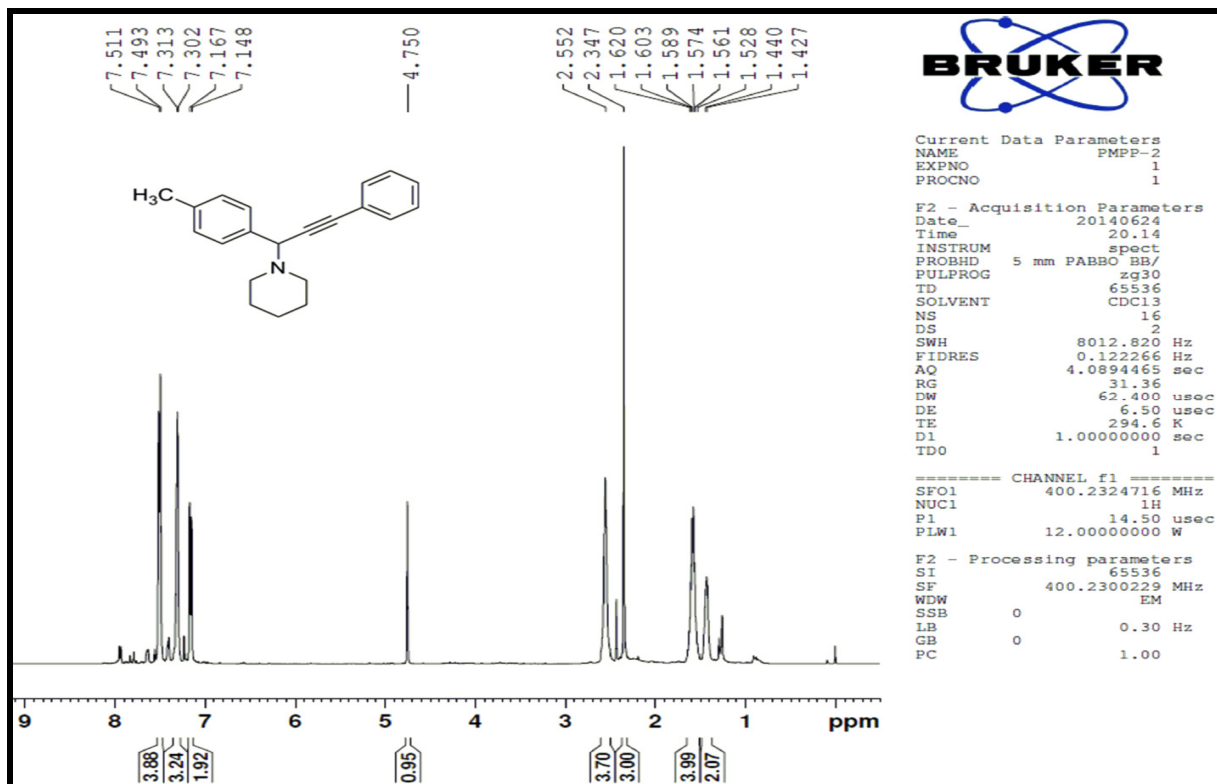

<sup>1</sup>H NMR spectrum of compound **7g**

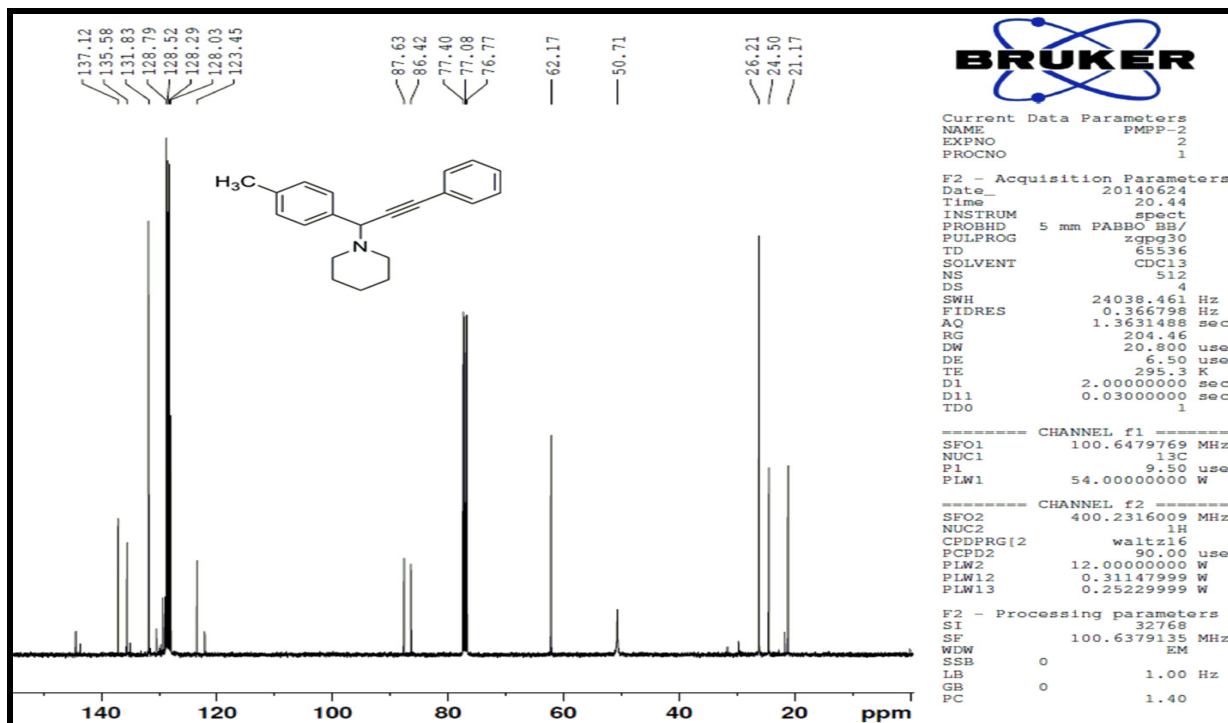

<sup>13</sup>C NMR spectrum of compound **7g**

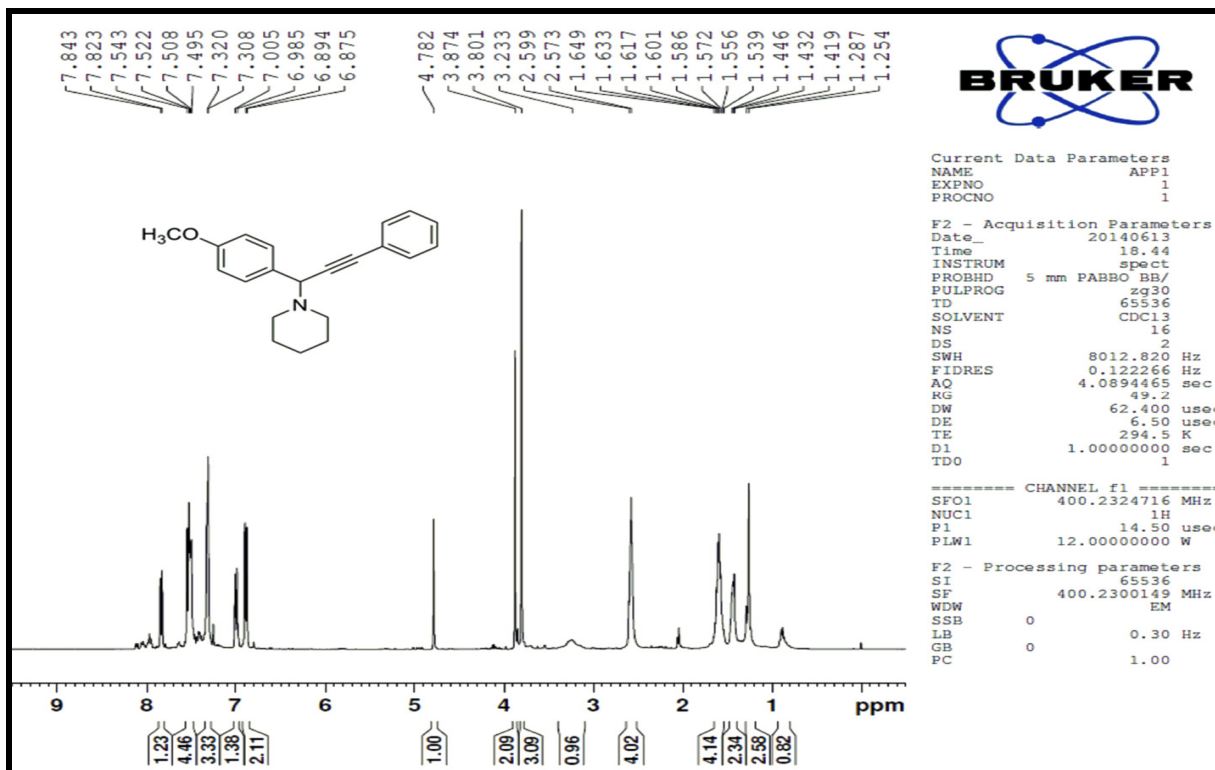

<sup>1</sup>H NMR spectrum of compound 7h

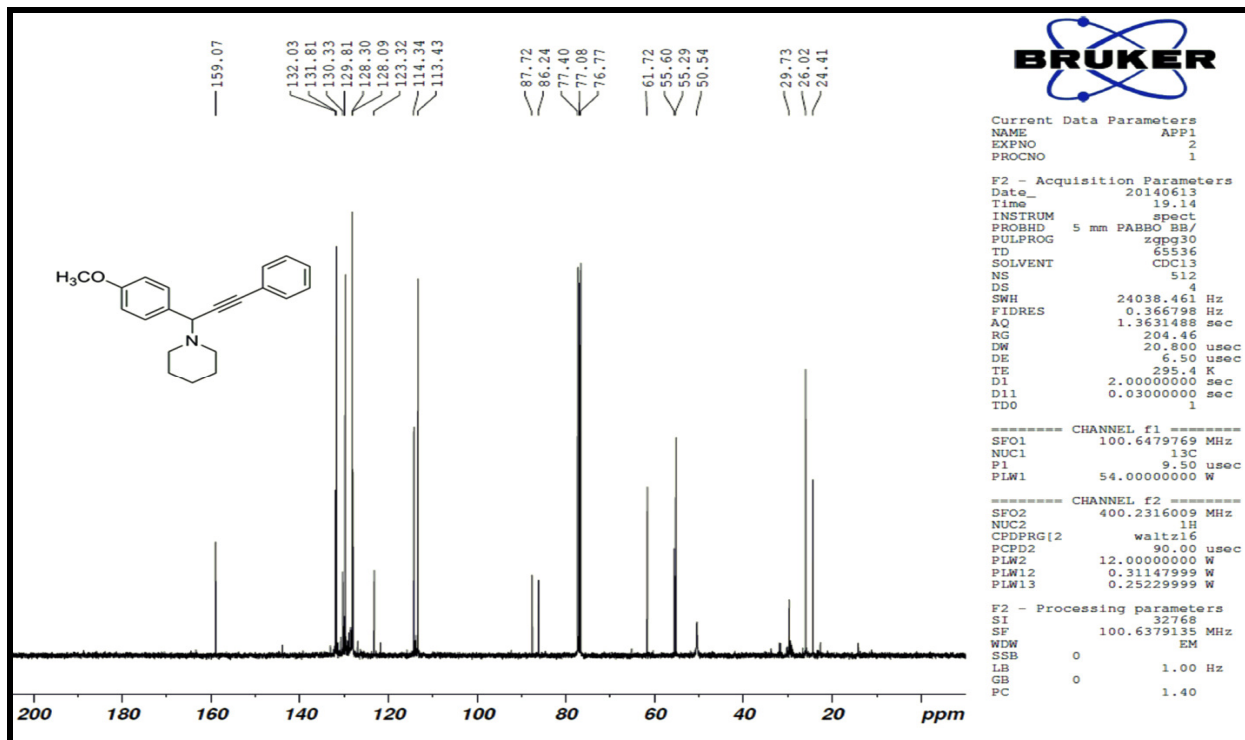

<sup>13</sup>C NMR spectrum of compound 7h

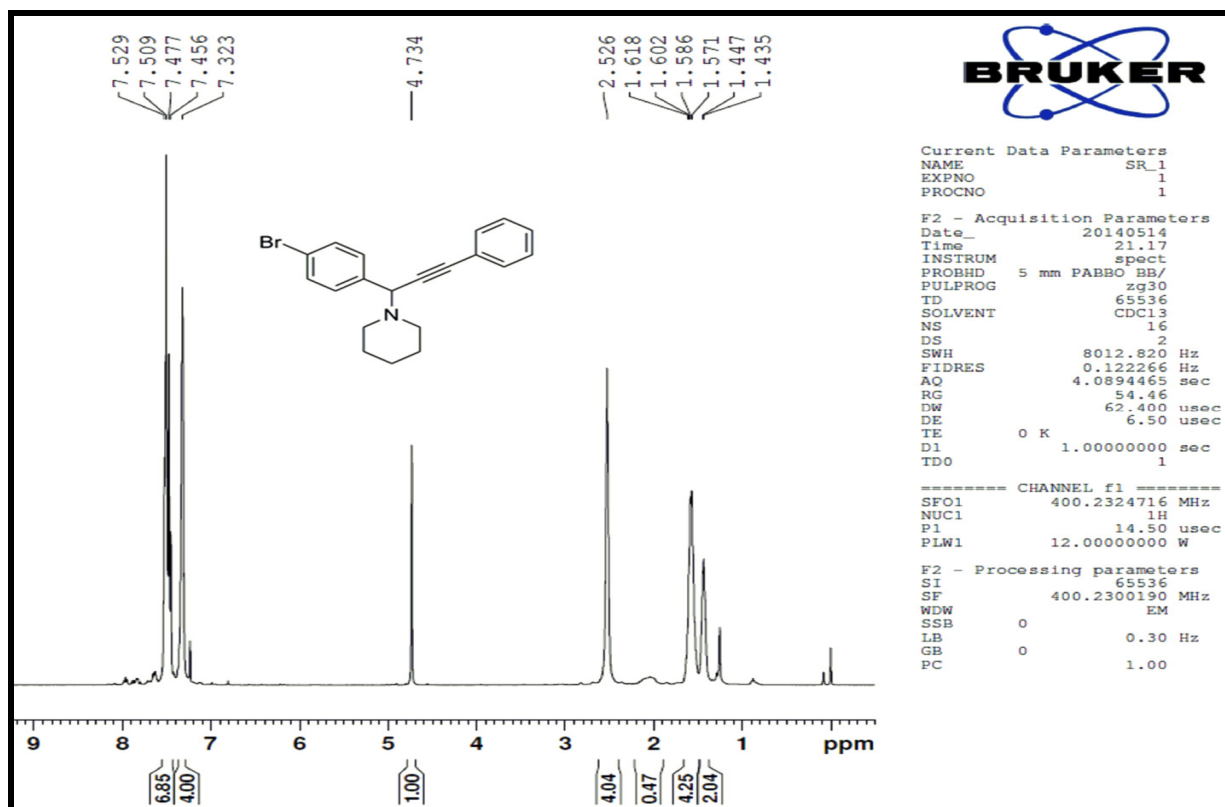

$^1\text{H}$  NMR spectrum of compound **7i**

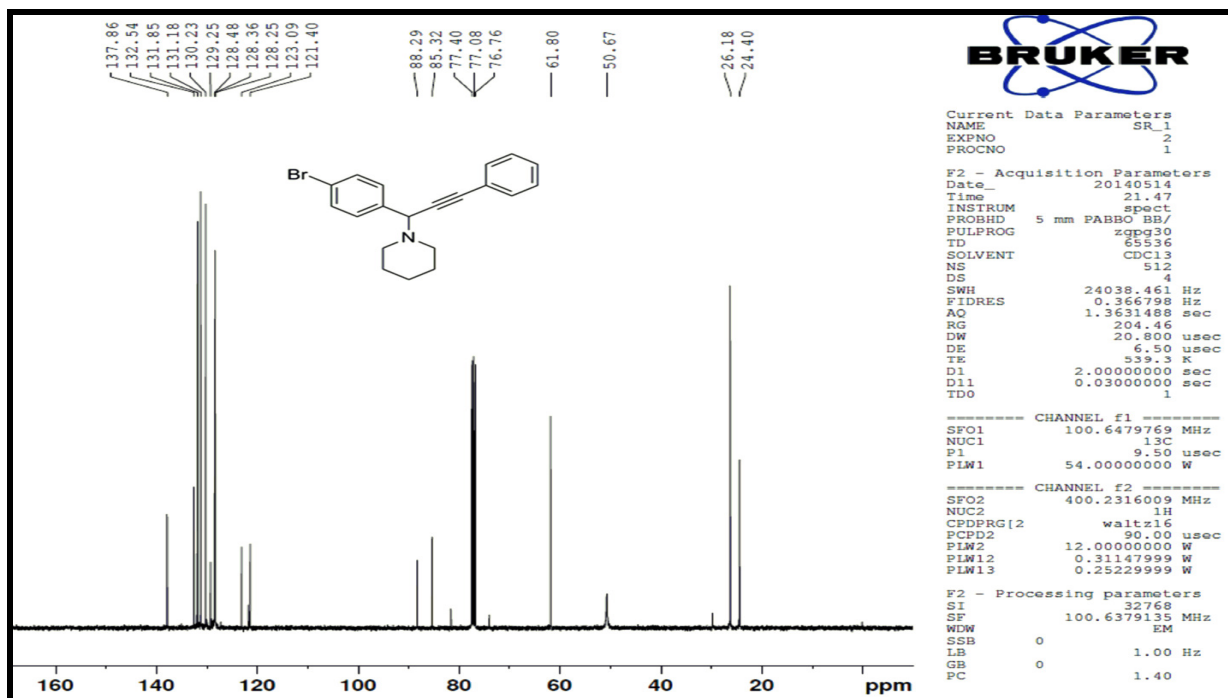

$^{13}\text{C}$  NMR spectrum of compound **7i**

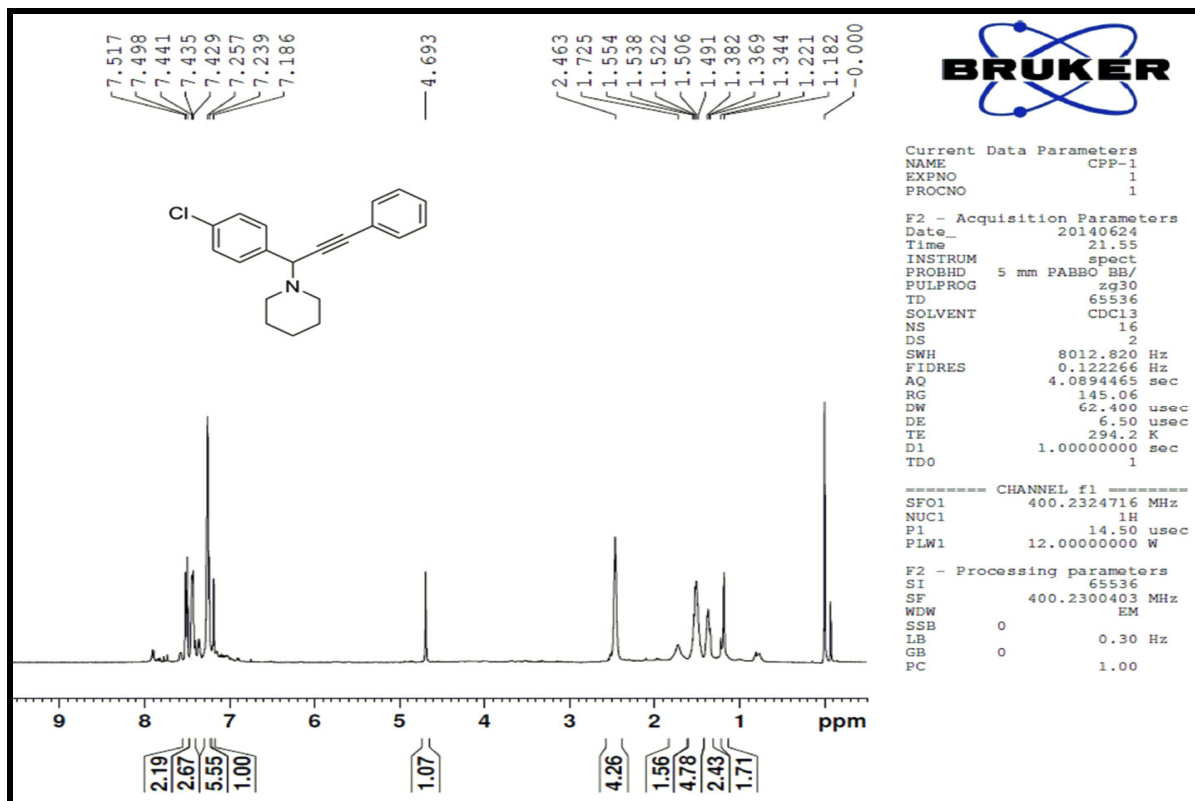

<sup>1</sup>H NMR spectrum of compound 7j

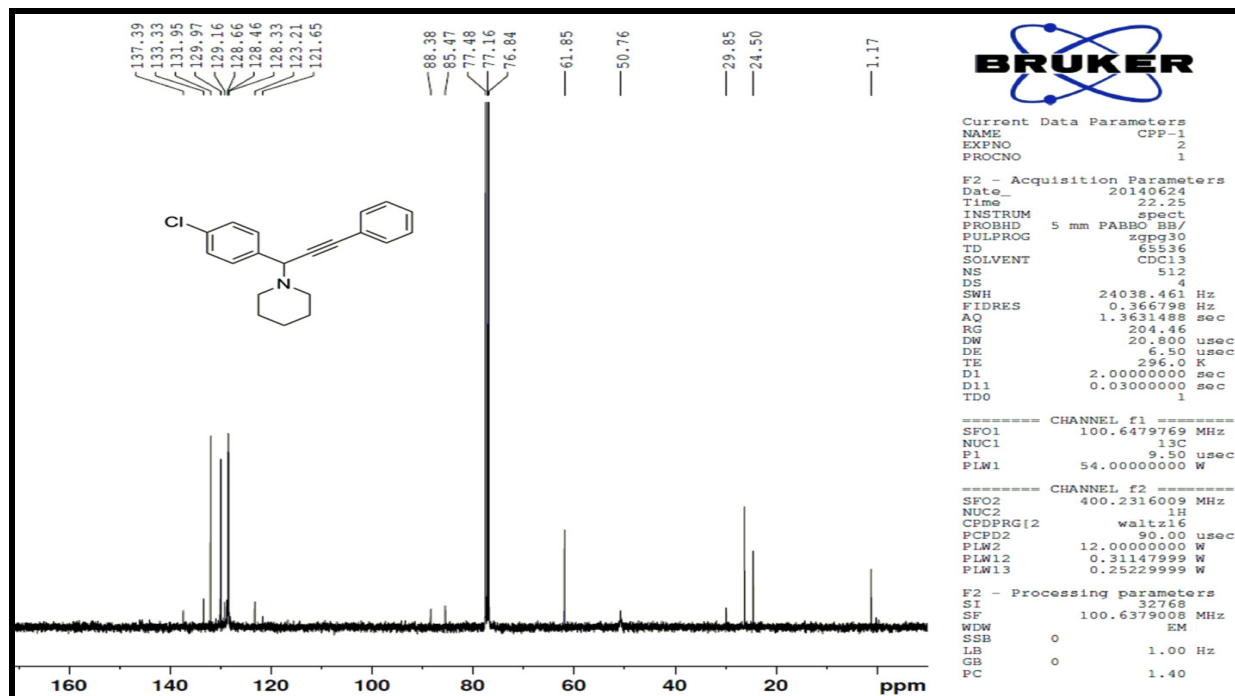

<sup>13</sup>C NMR spectrum of compound 7j
